# Supplementary material
Source: PubMed Central journal article supplement (PMC3153584)

Male-to-Female MRRs and Sex-Specific Mortality Rates of Peritoneum, Omentum and Mesentery by Age, 1977 to 2006.

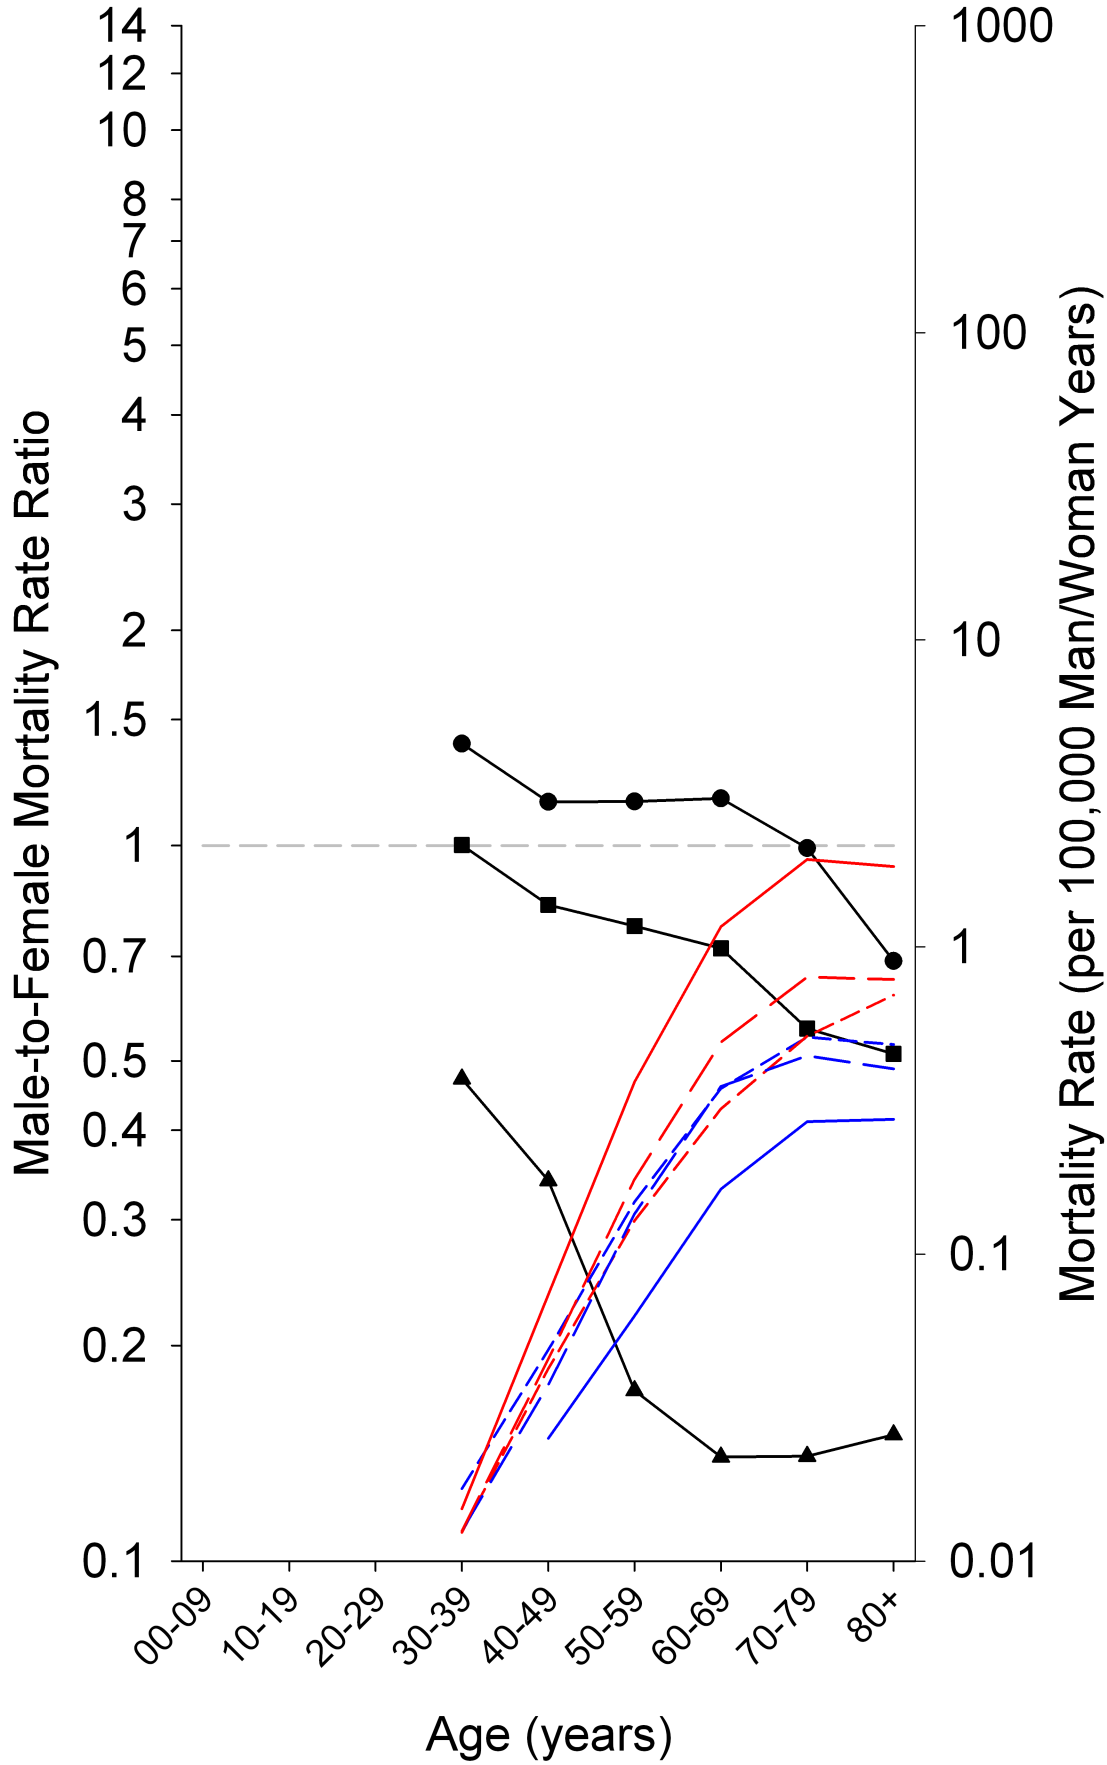

Supplement: NIHMS302507-supplement-26.pdf [file NIHMS302507-supplement-26.pdf]
