# Supplementary material
Source: PubMed Central journal article supplement (PMC3153584)

Male-to-Female MRRs and Sex-Specific Mortality Rates of Eye and Orbit by Age, 1977 to 2006.

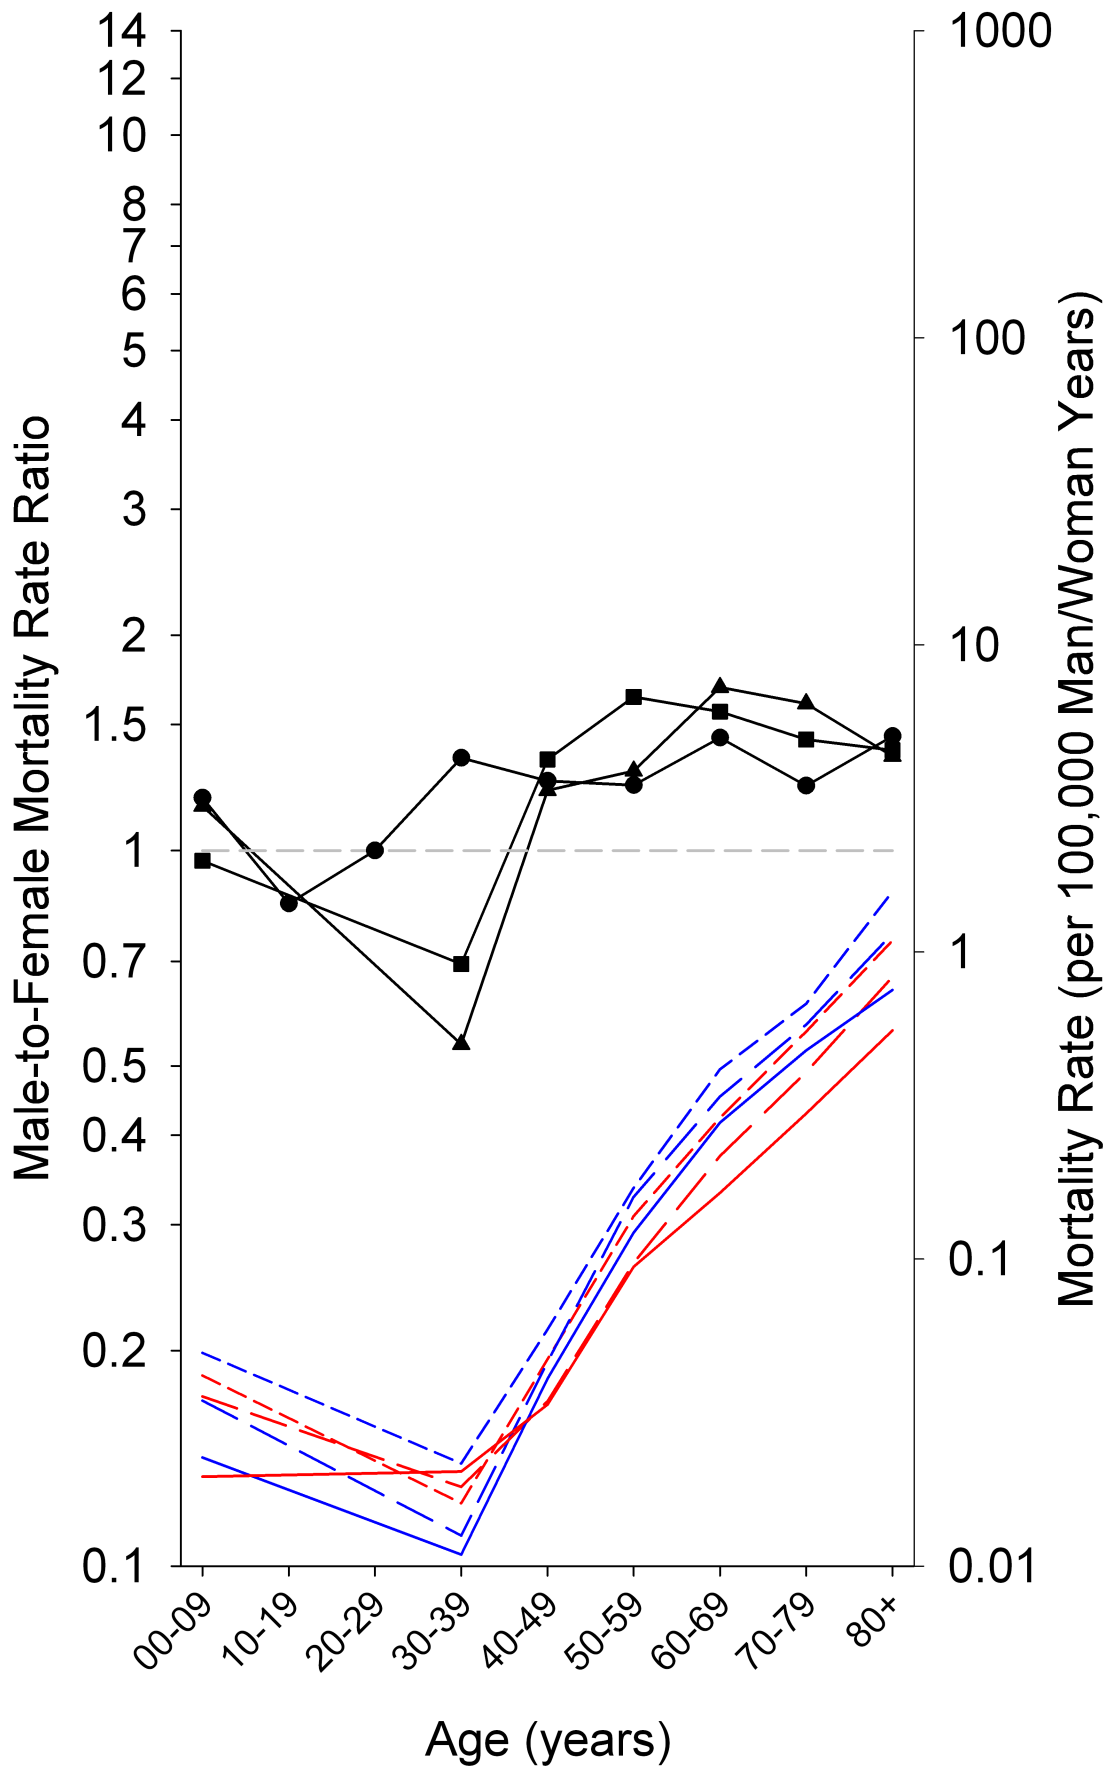

Supplement: NIHMS302507-supplement-10.pdf [file NIHMS302507-supplement-10.pdf]

Male-to-Female MRRs and Sex-Specific Mortality Rates of Floor of Mouth by Age, 1977 to 2006.

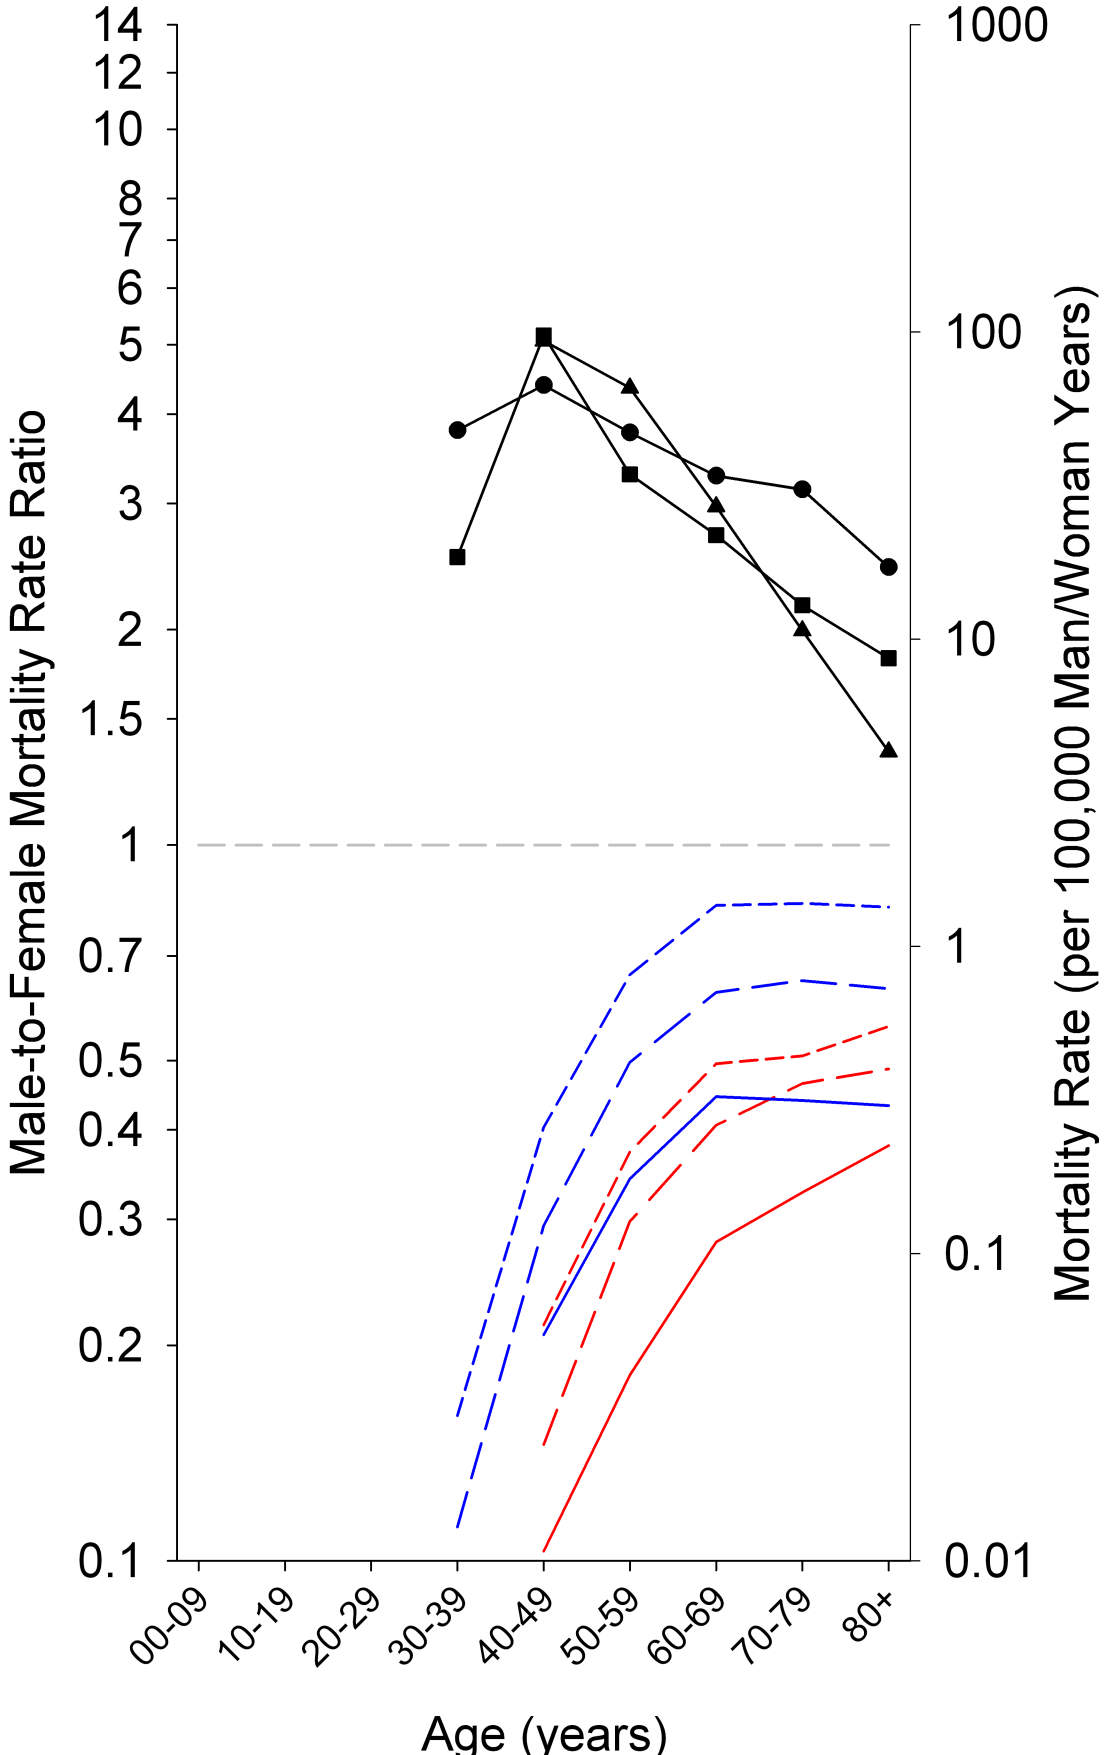

Supplement: NIHMS302507-supplement-11.pdf [file NIHMS302507-supplement-11.pdf]

Male-to-Female MRRs and Sex-Specific Mortality Rates of Gallbladder by Age, 1977 to 2006.

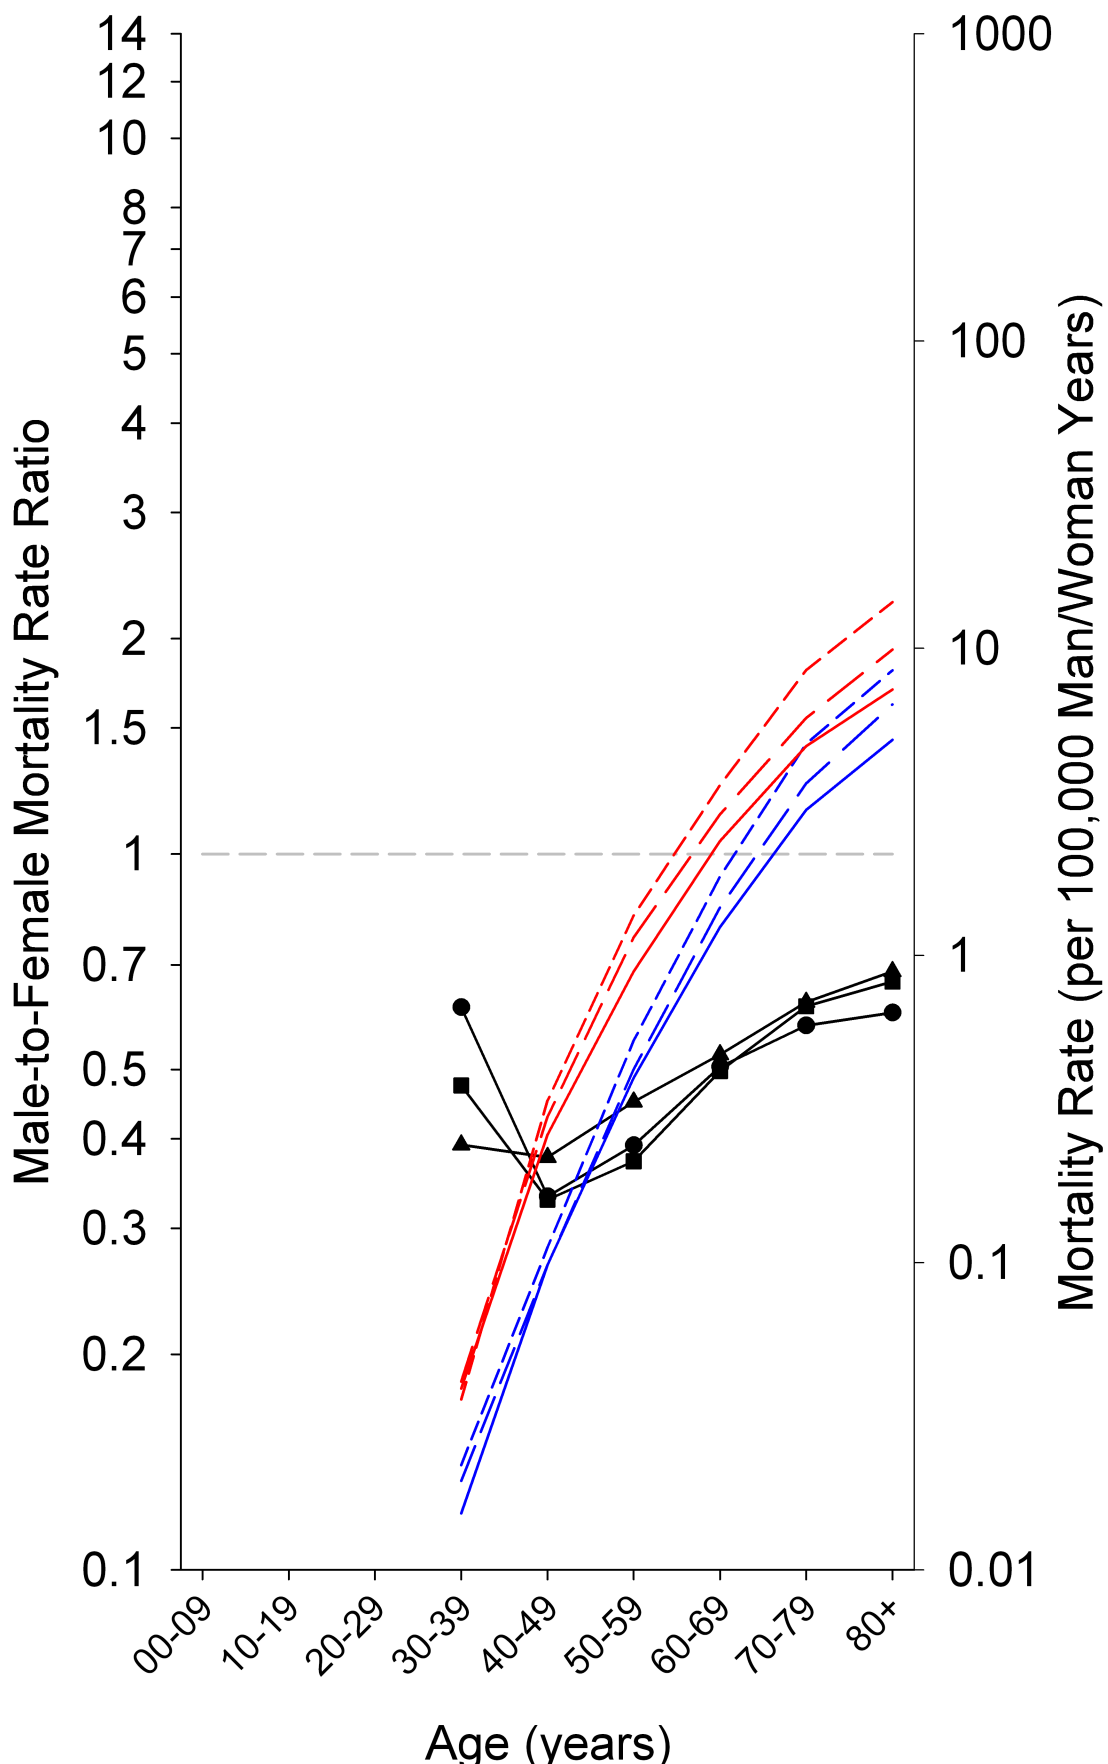

Supplement: NIHMS302507-supplement-12.pdf [file NIHMS302507-supplement-12.pdf]

Male-to-Female MRRs and Sex-Specific Mortality Rates of Gum and Other Mouth by Age, 1977 to 2006.

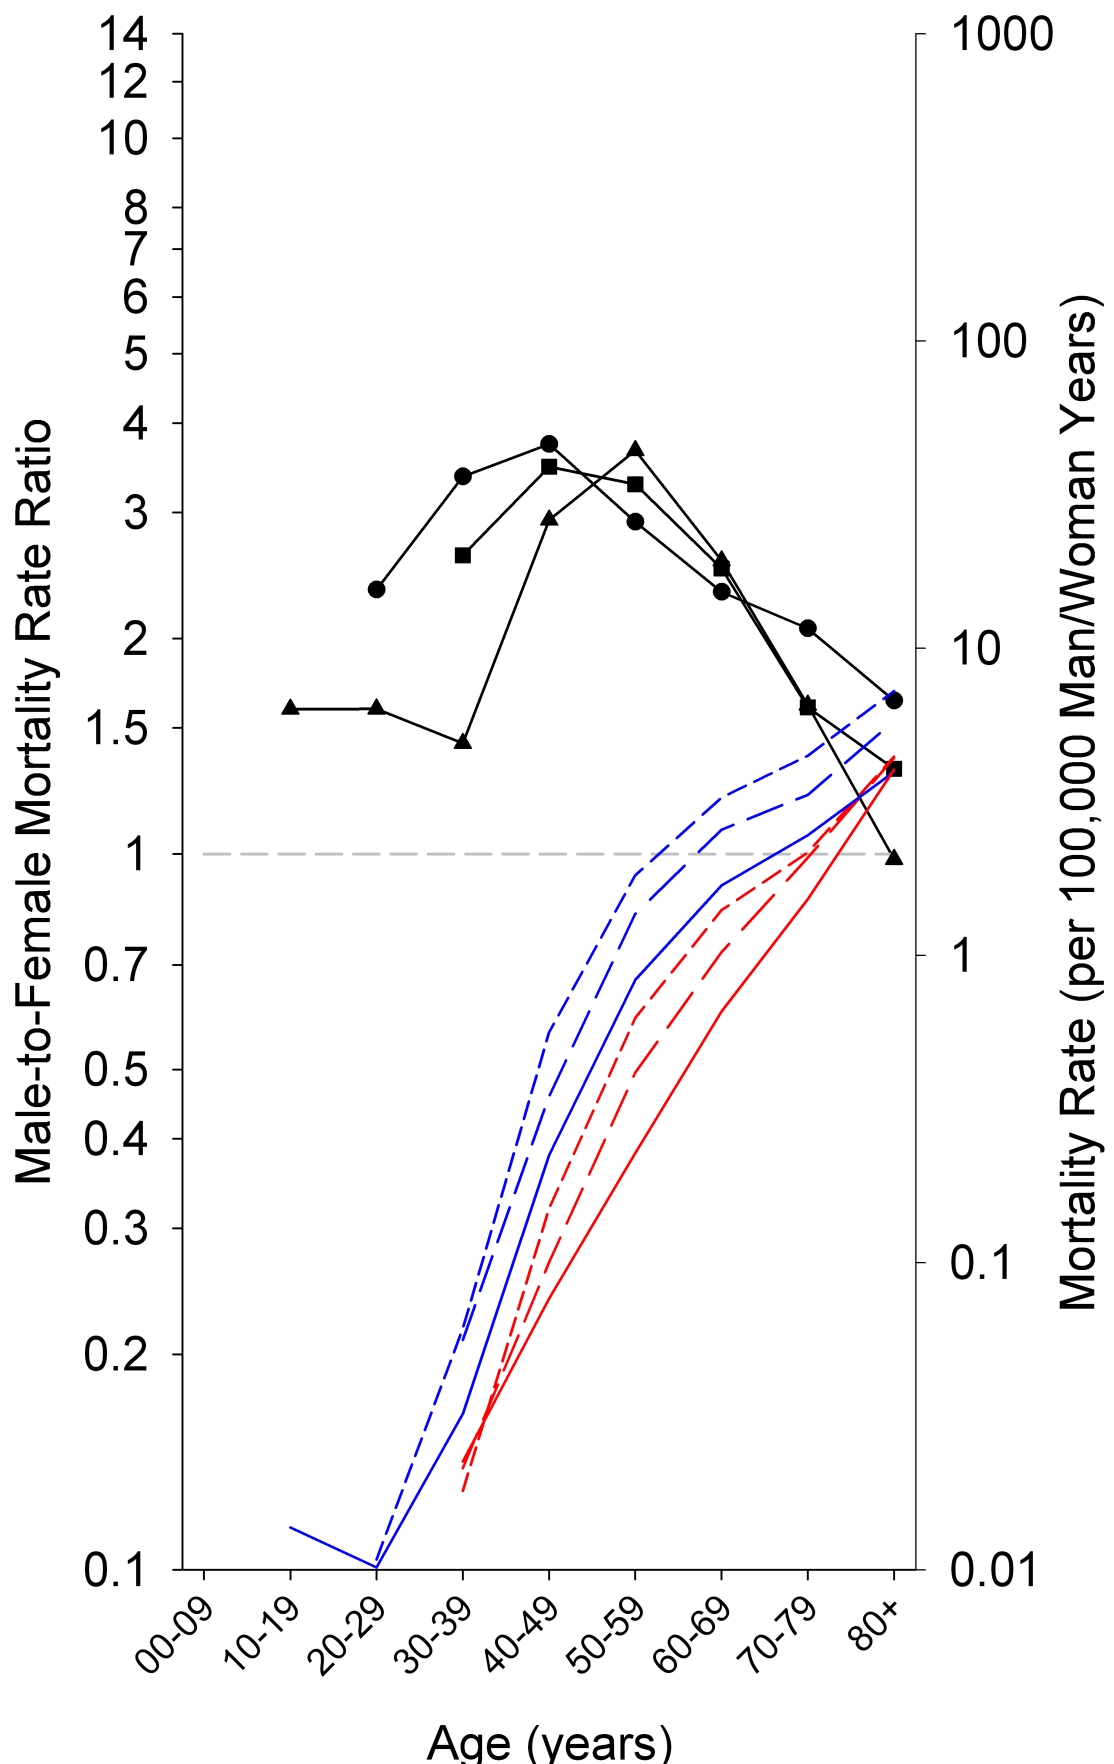

Supplement: NIHMS302507-supplement-13.pdf [file NIHMS302507-supplement-13.pdf]

Male-to-Female MRRs and Sex-Specific Mortality Rates of Hodgkin Lymphoma by Age, 1977 to 2006.

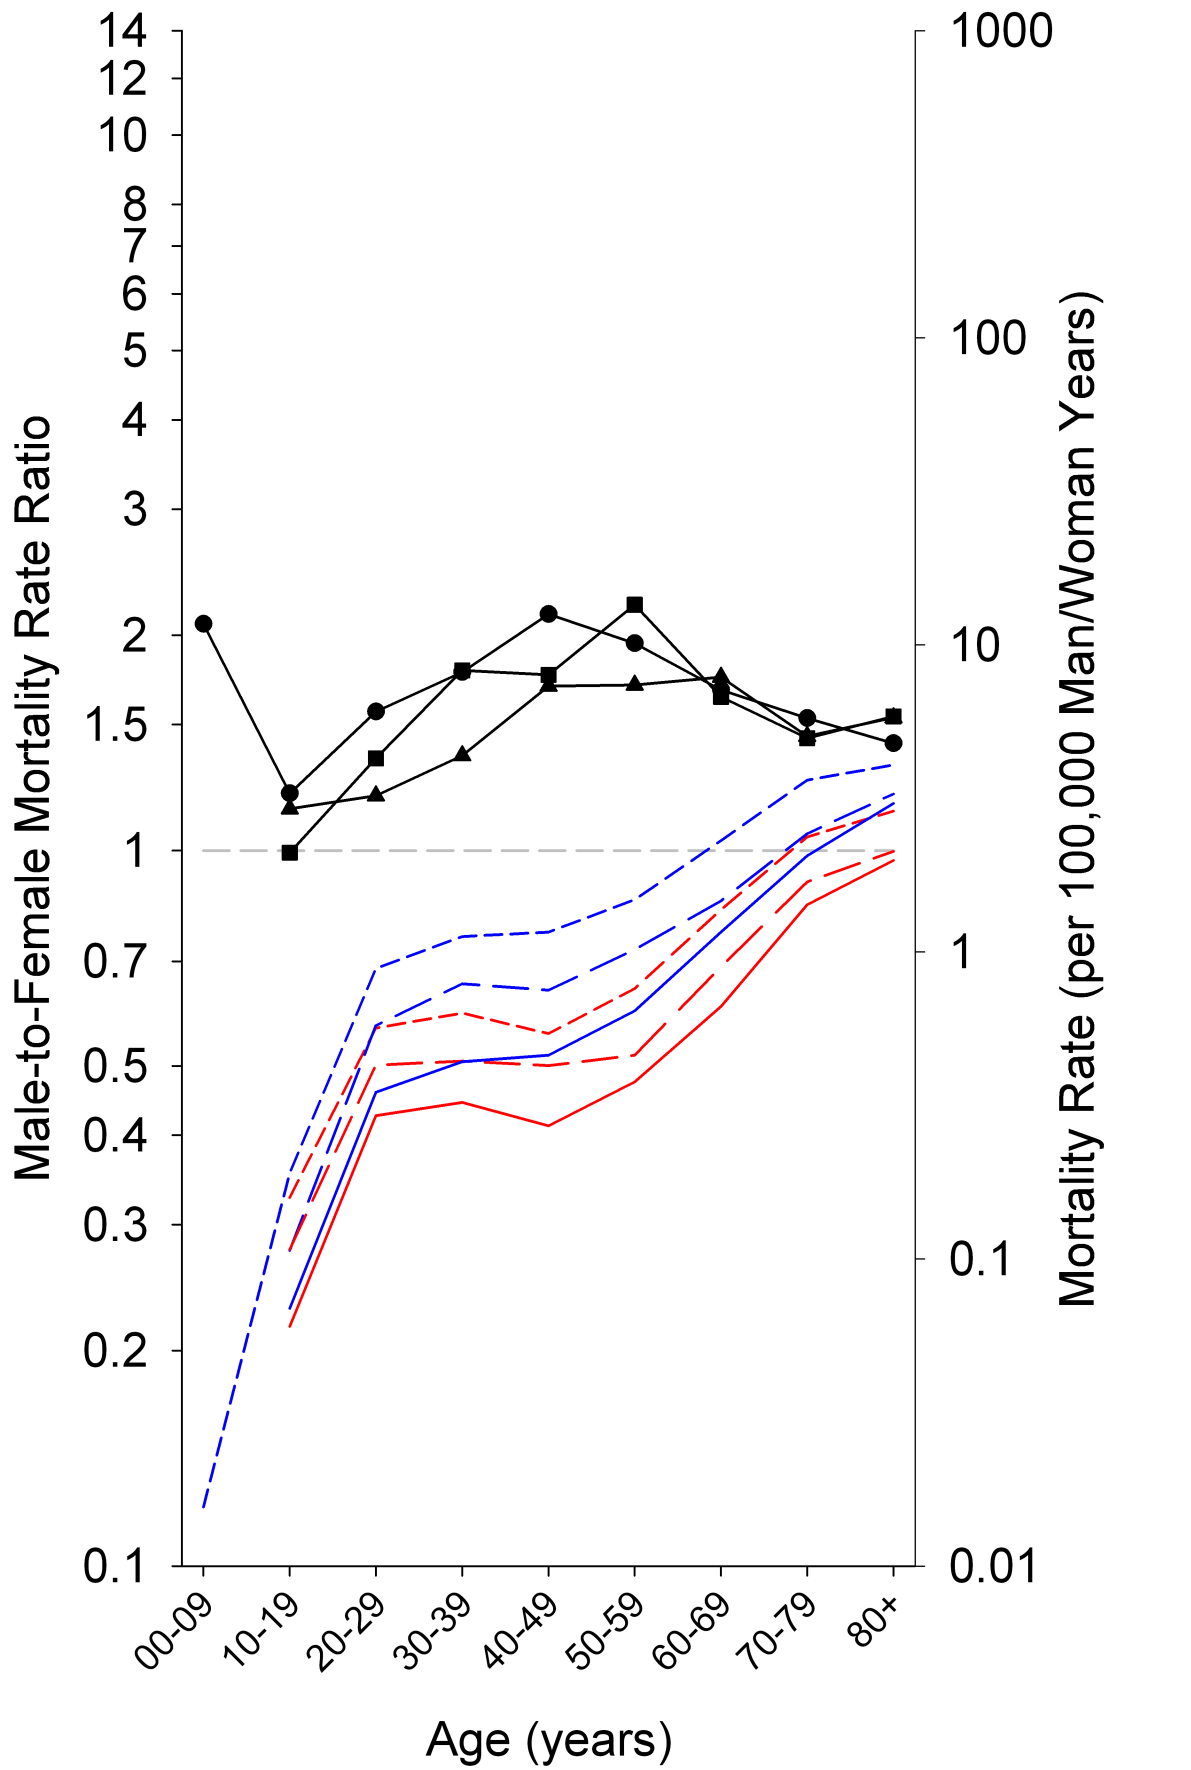

Supplement: NIHMS302507-supplement-14.pdf [file NIHMS302507-supplement-14.pdf]

Male-to-Female MRRs and Sex-Specific Mortality Rates of Hypopharynx by Age, 1977 to 2006.

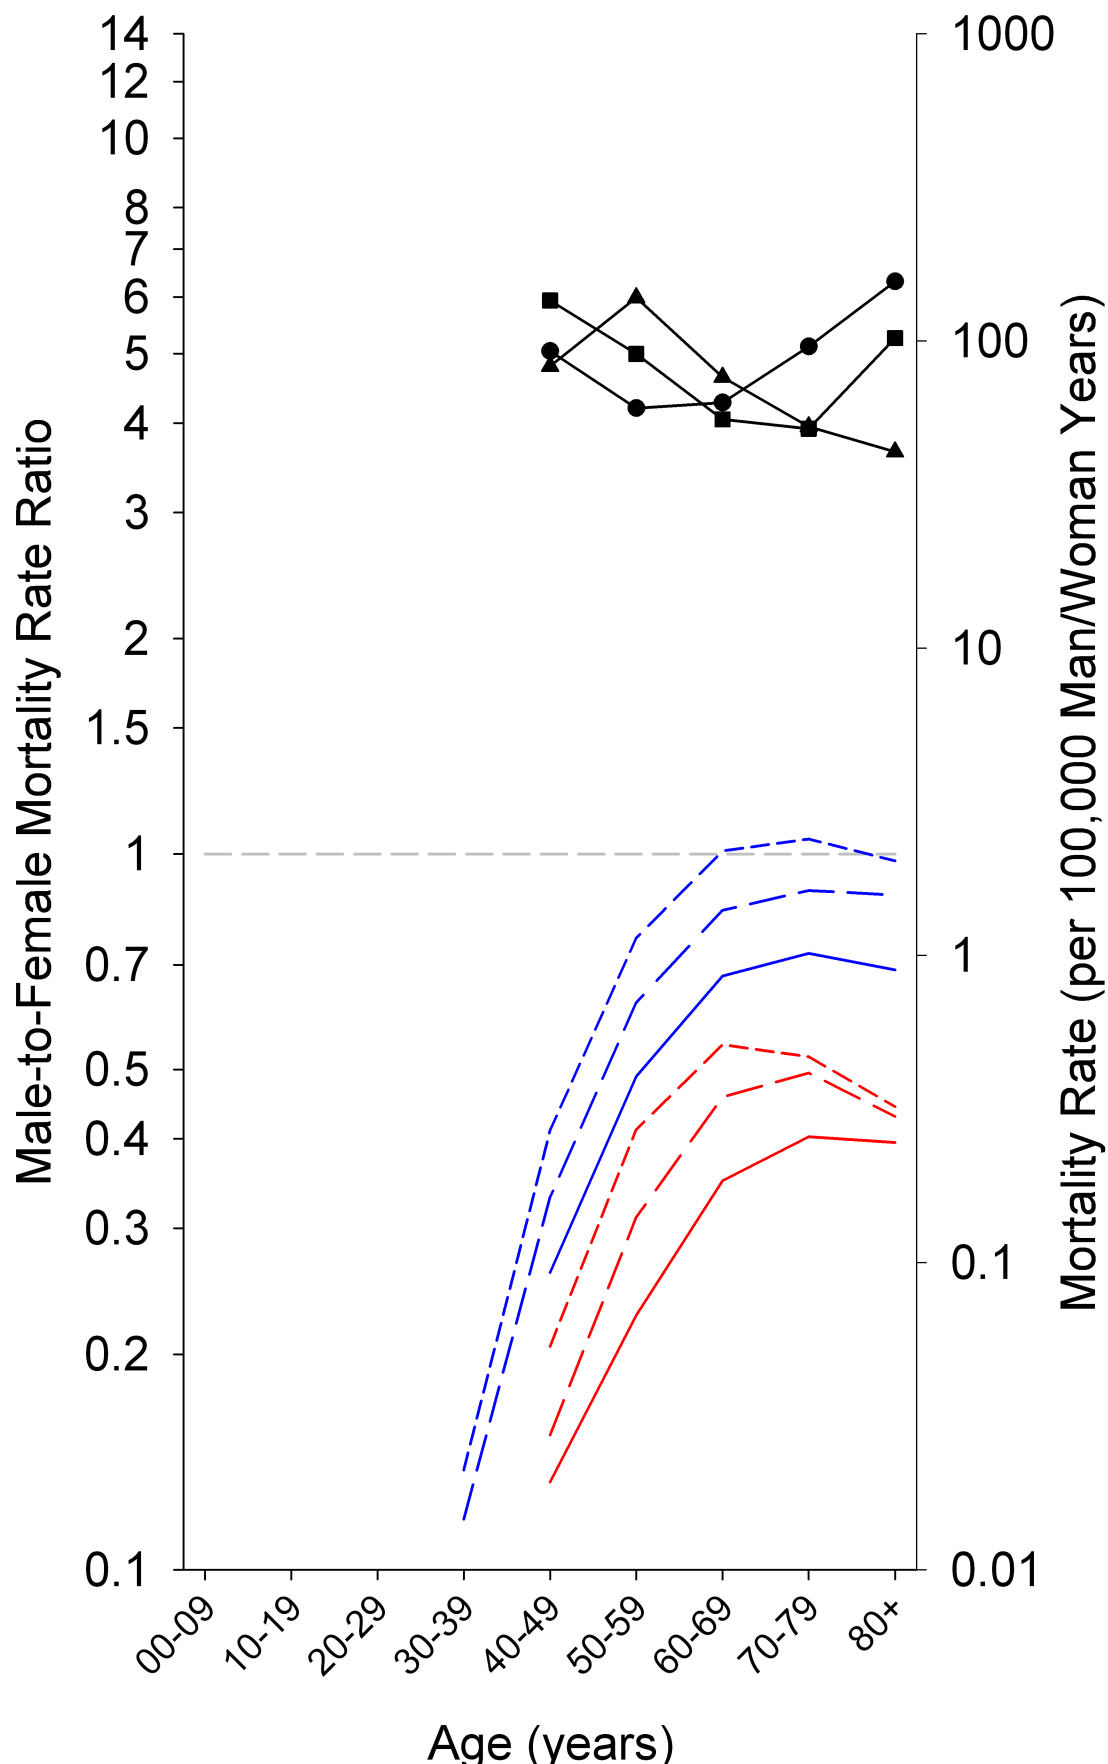

Supplement: NIHMS302507-supplement-15.pdf [file NIHMS302507-supplement-15.pdf]

Male-to-Female MRRs and Sex-Specific Mortality Rates of Kidney and Renal Pelvis by Age, 1977 to 2006.

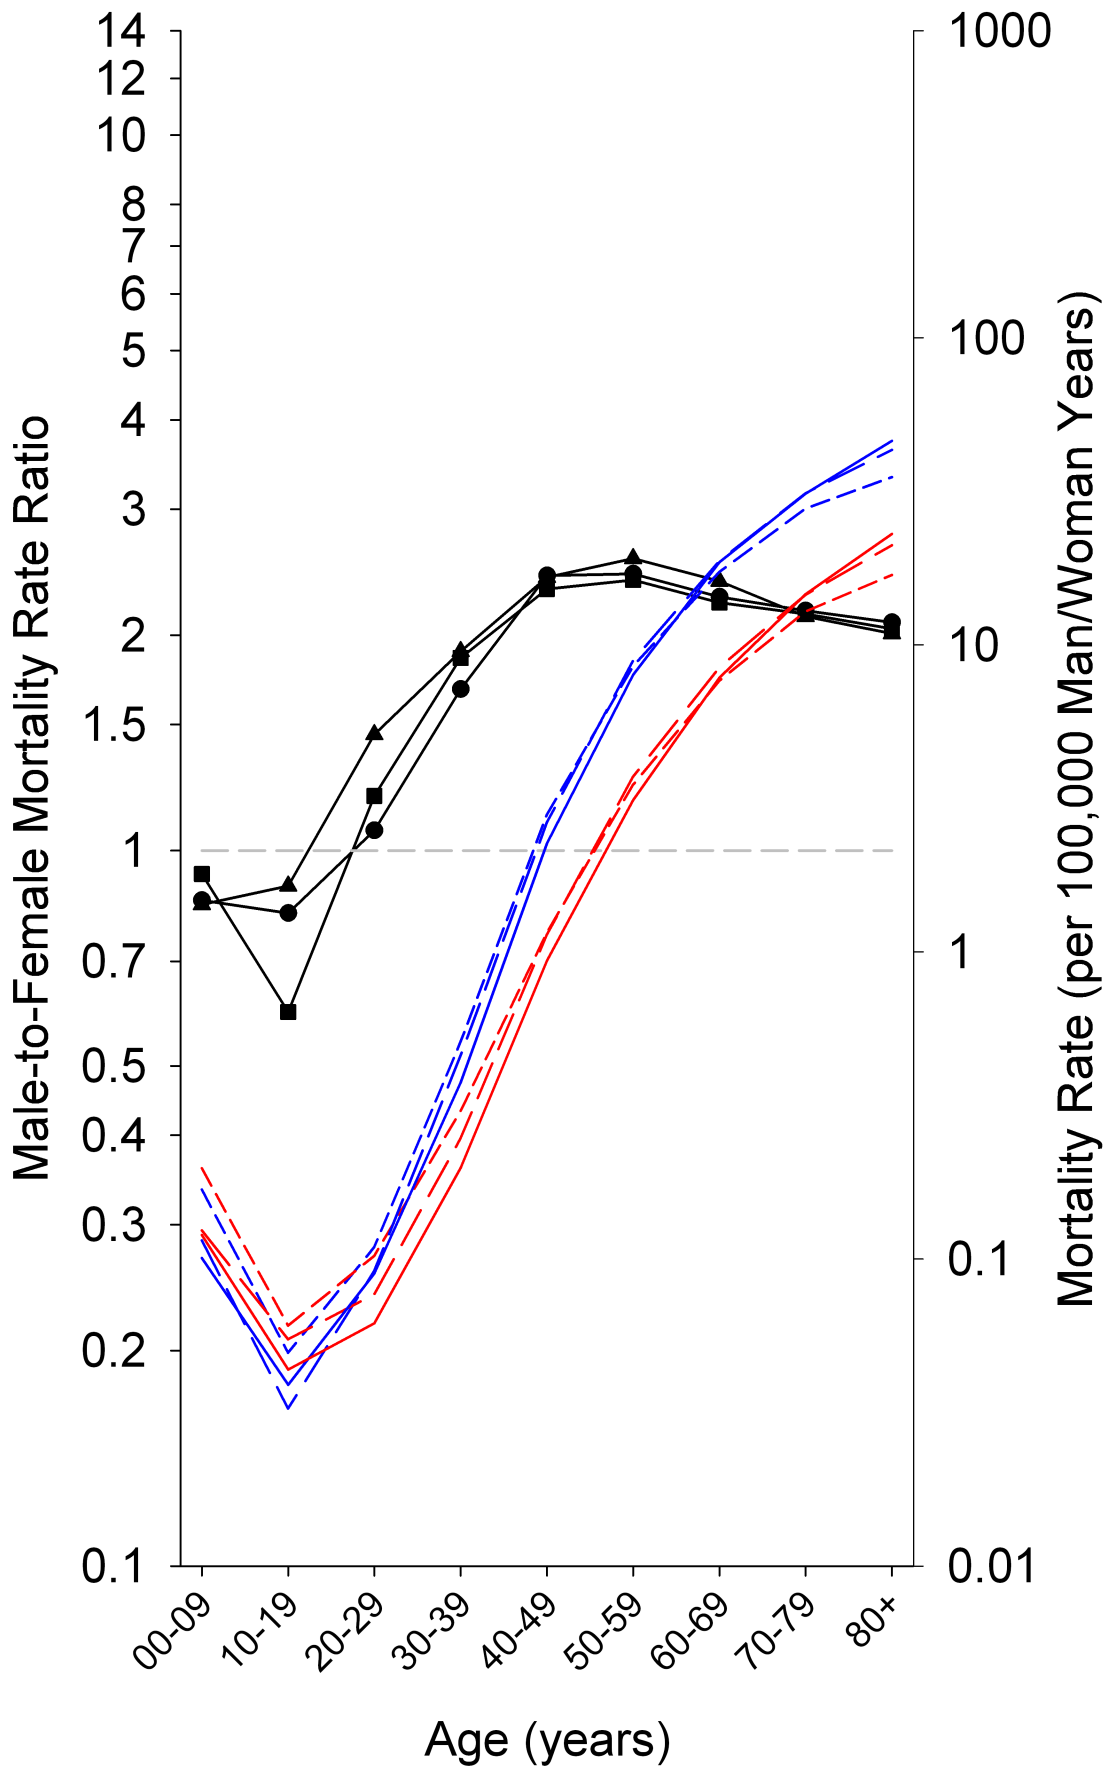

Supplement: NIHMS302507-supplement-16.pdf [file NIHMS302507-supplement-16.pdf]

Male-to-Female MRRs and Sex-Specific Mortality Rates of Leukemia by Age, 1977 to 2006.

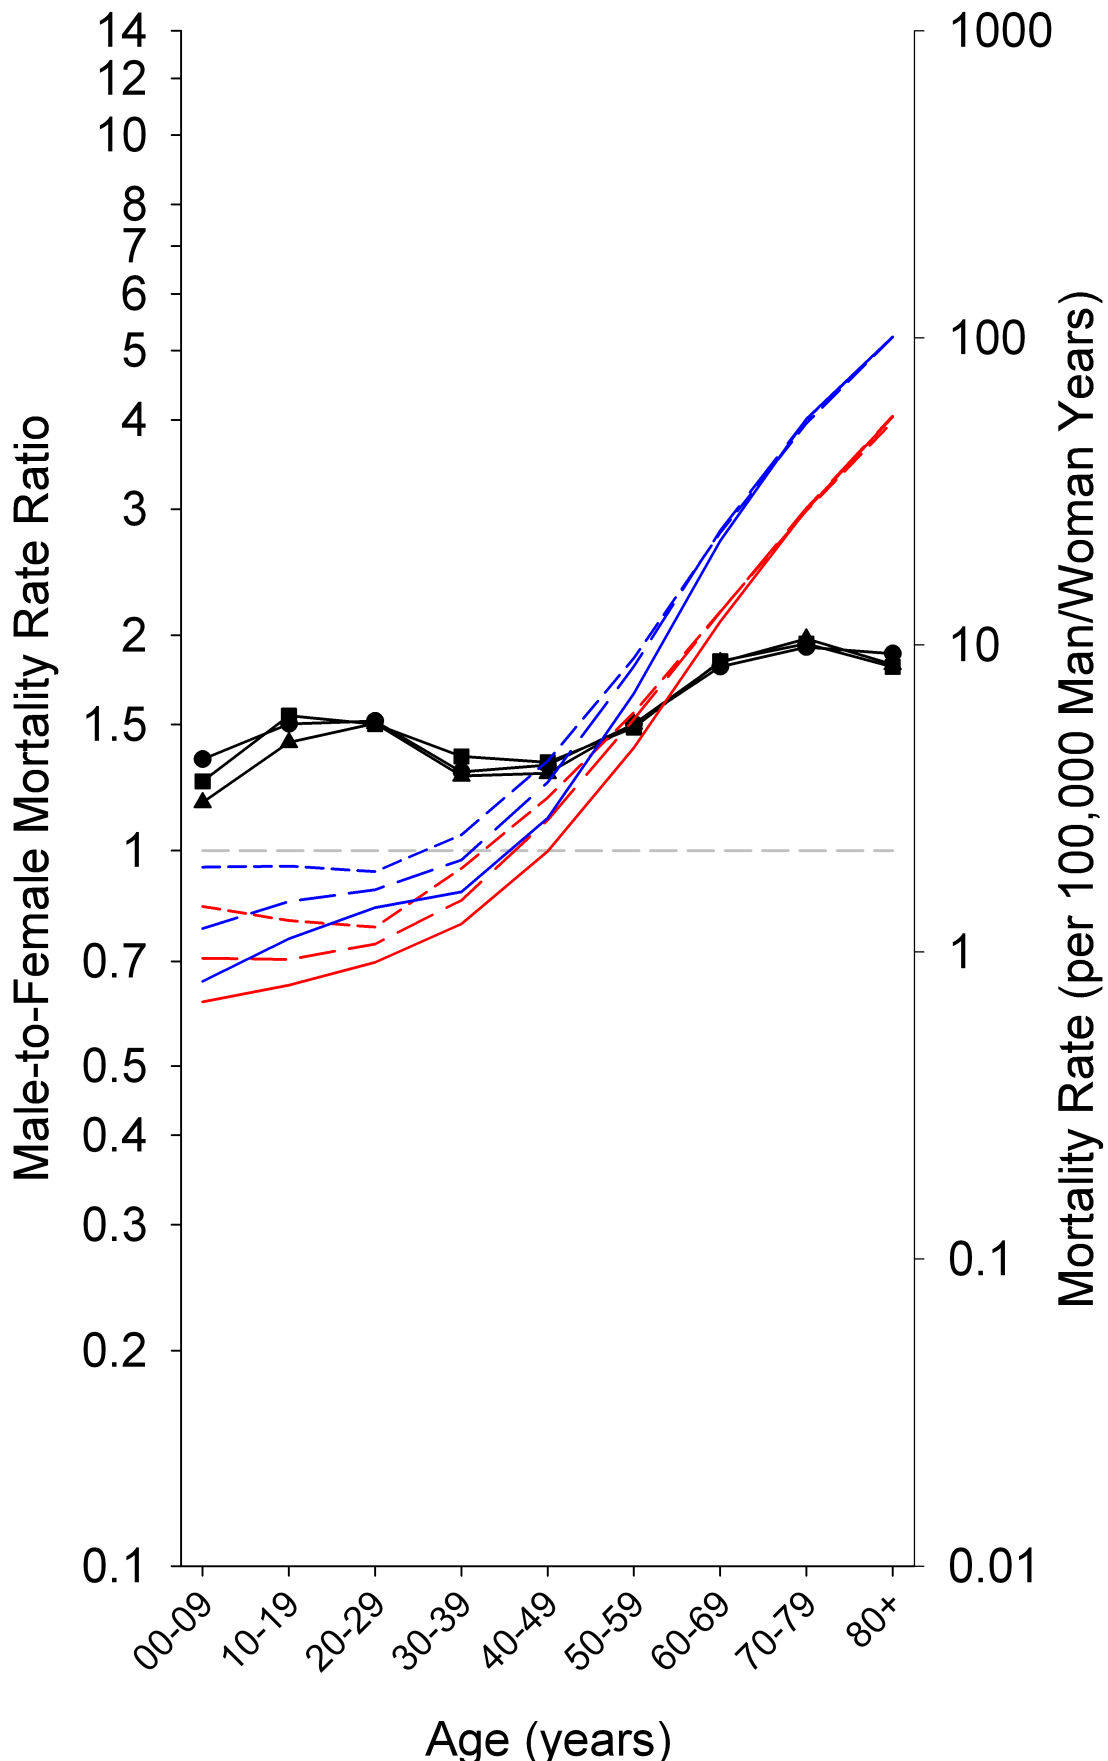

Supplement: NIHMS302507-supplement-17.pdf [file NIHMS302507-supplement-17.pdf]

Male-to-Female MRRs and Sex-Specific Mortality Rates of Lip by Age, 1977 to 2006.

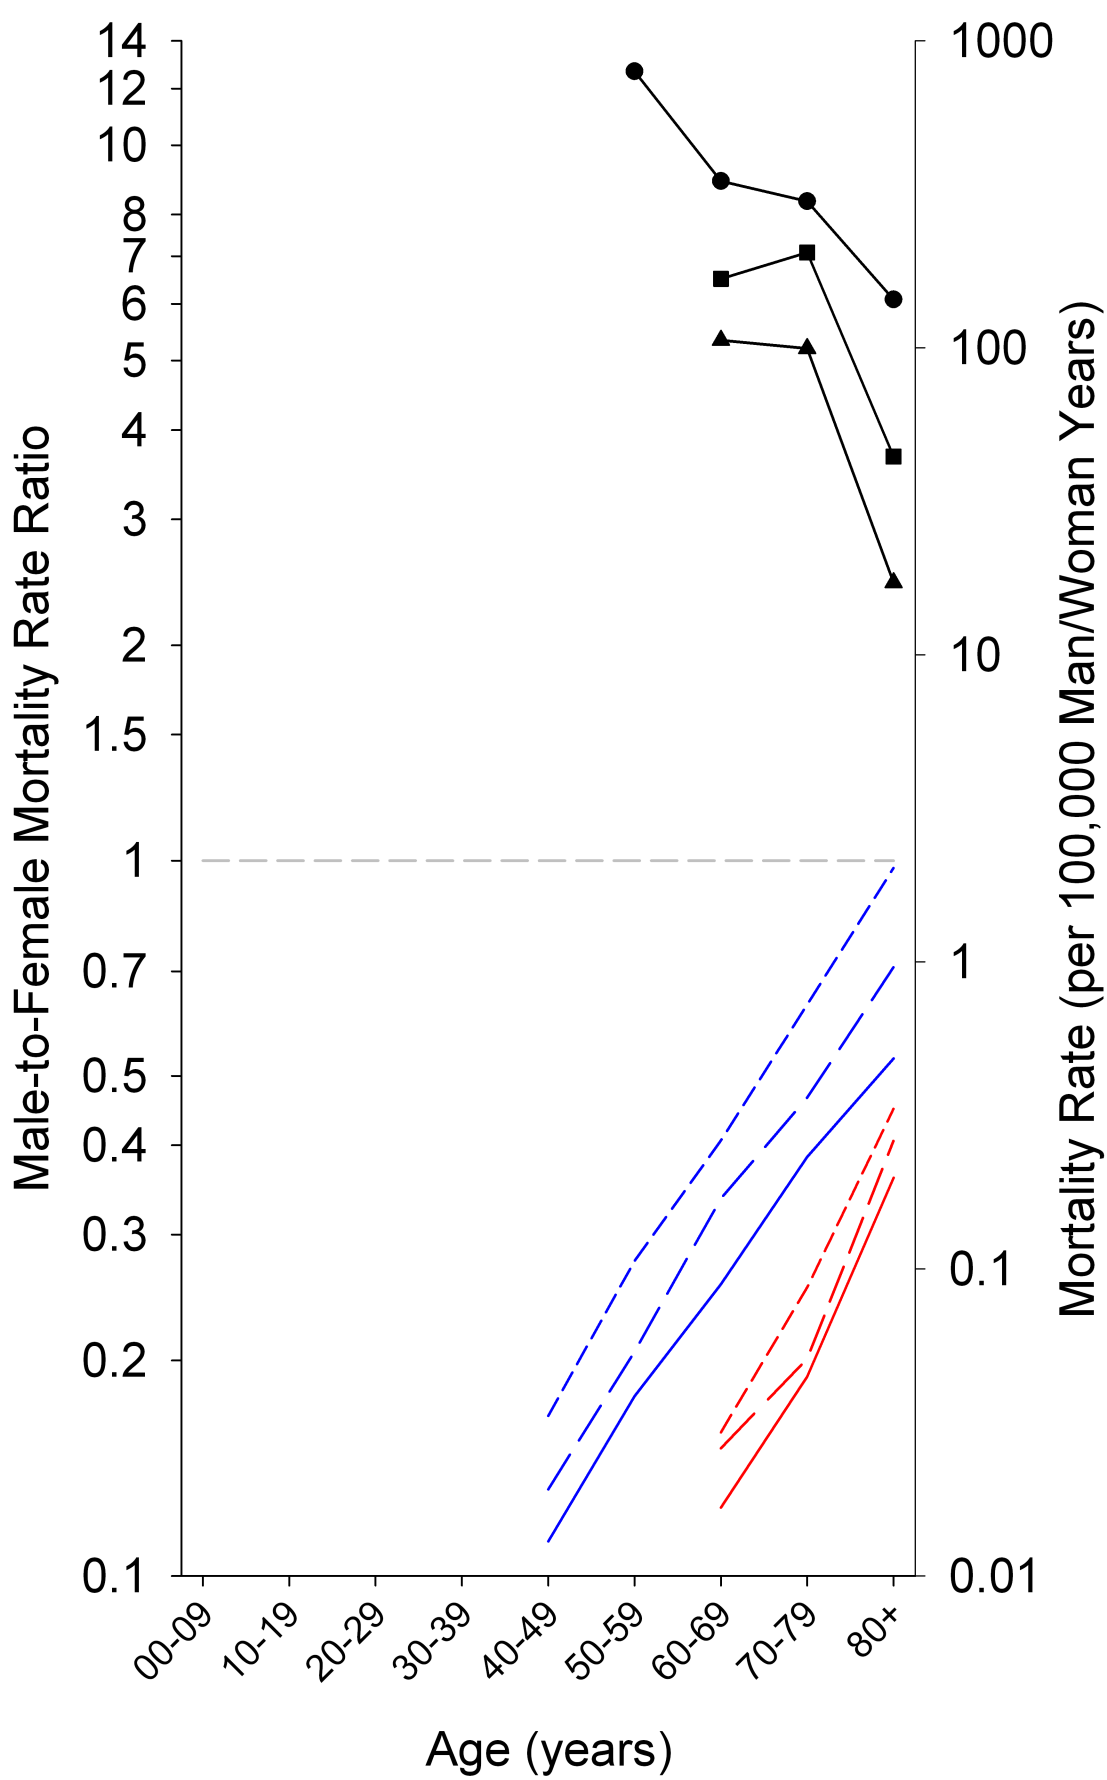

Supplement: NIHMS302507-supplement-18.pdf [file NIHMS302507-supplement-18.pdf]

Male-to-Female MRRs and Sex-Specific Mortality Rates of Lymphoma by Age, 1977 to 2006.

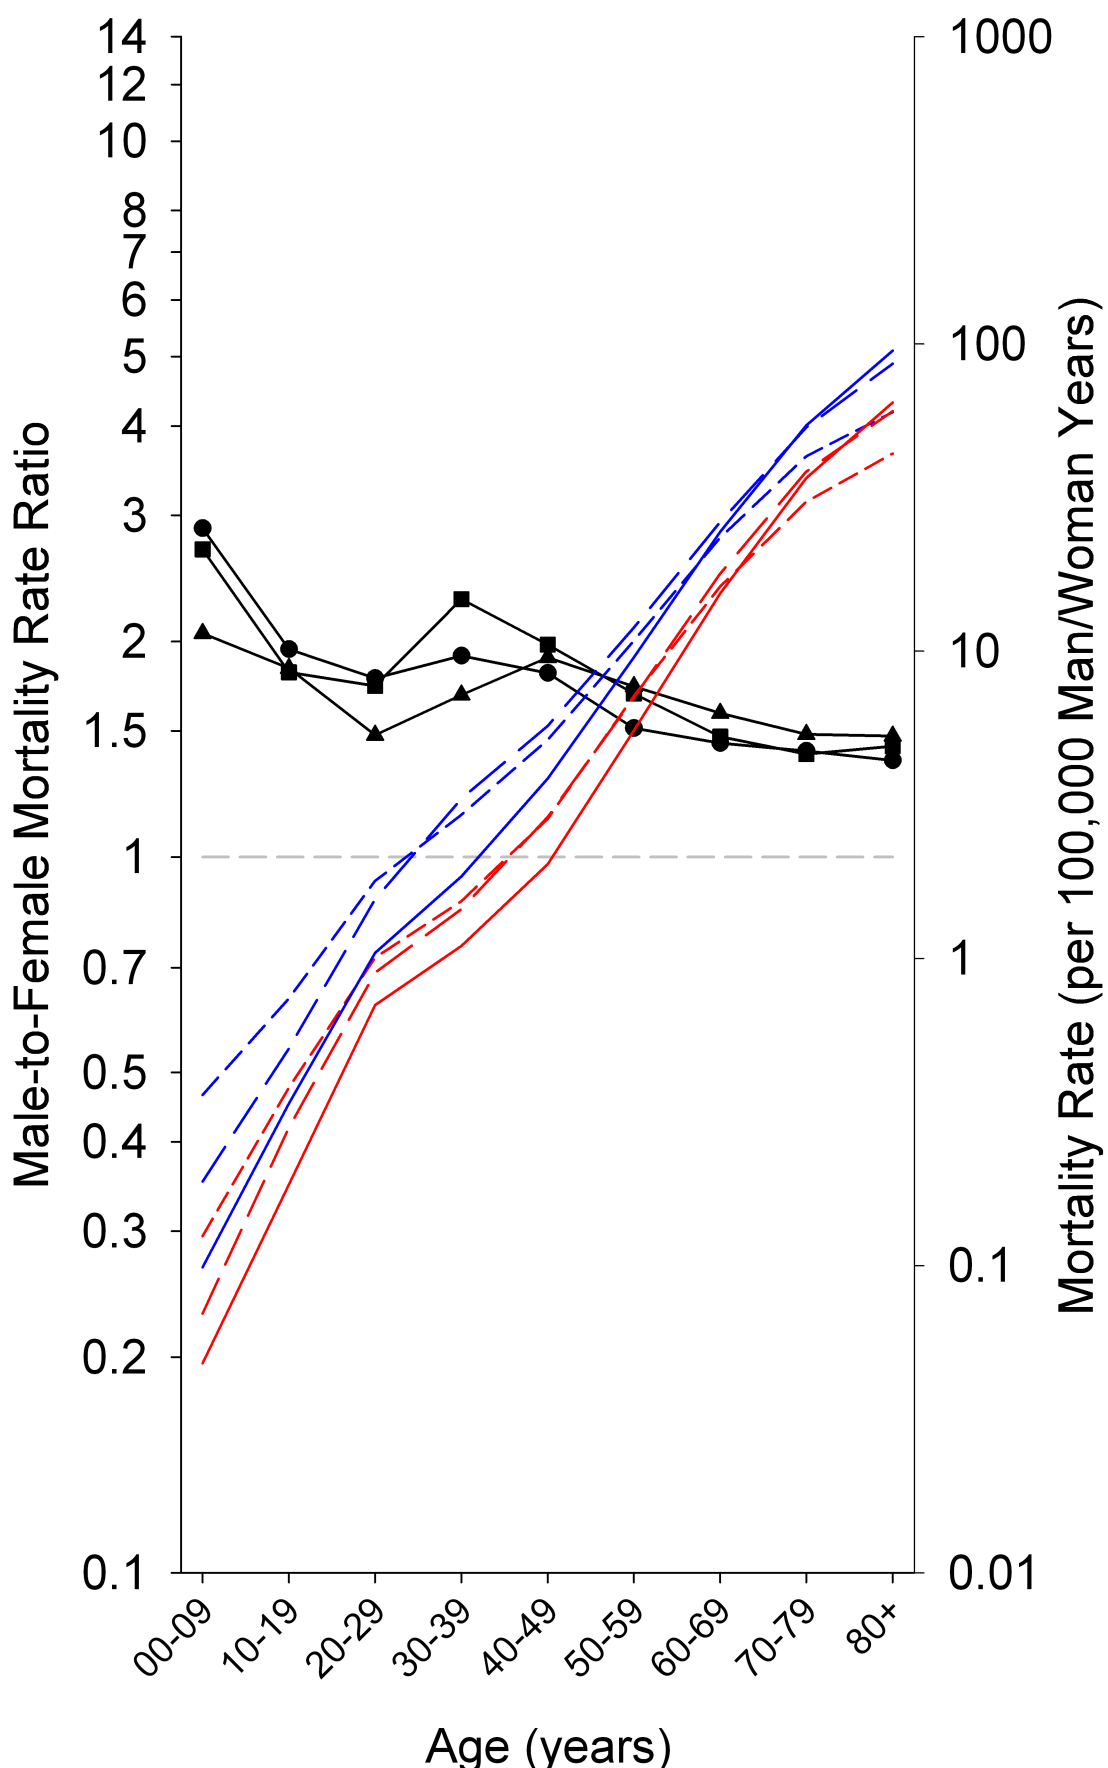

Supplement: NIHMS302507-supplement-19.pdf [file NIHMS302507-supplement-19.pdf]

Male-to-Female MRRs and Sex-Specific Mortality Rates of All Malignant Cancers by Age, 1977 to 2006.

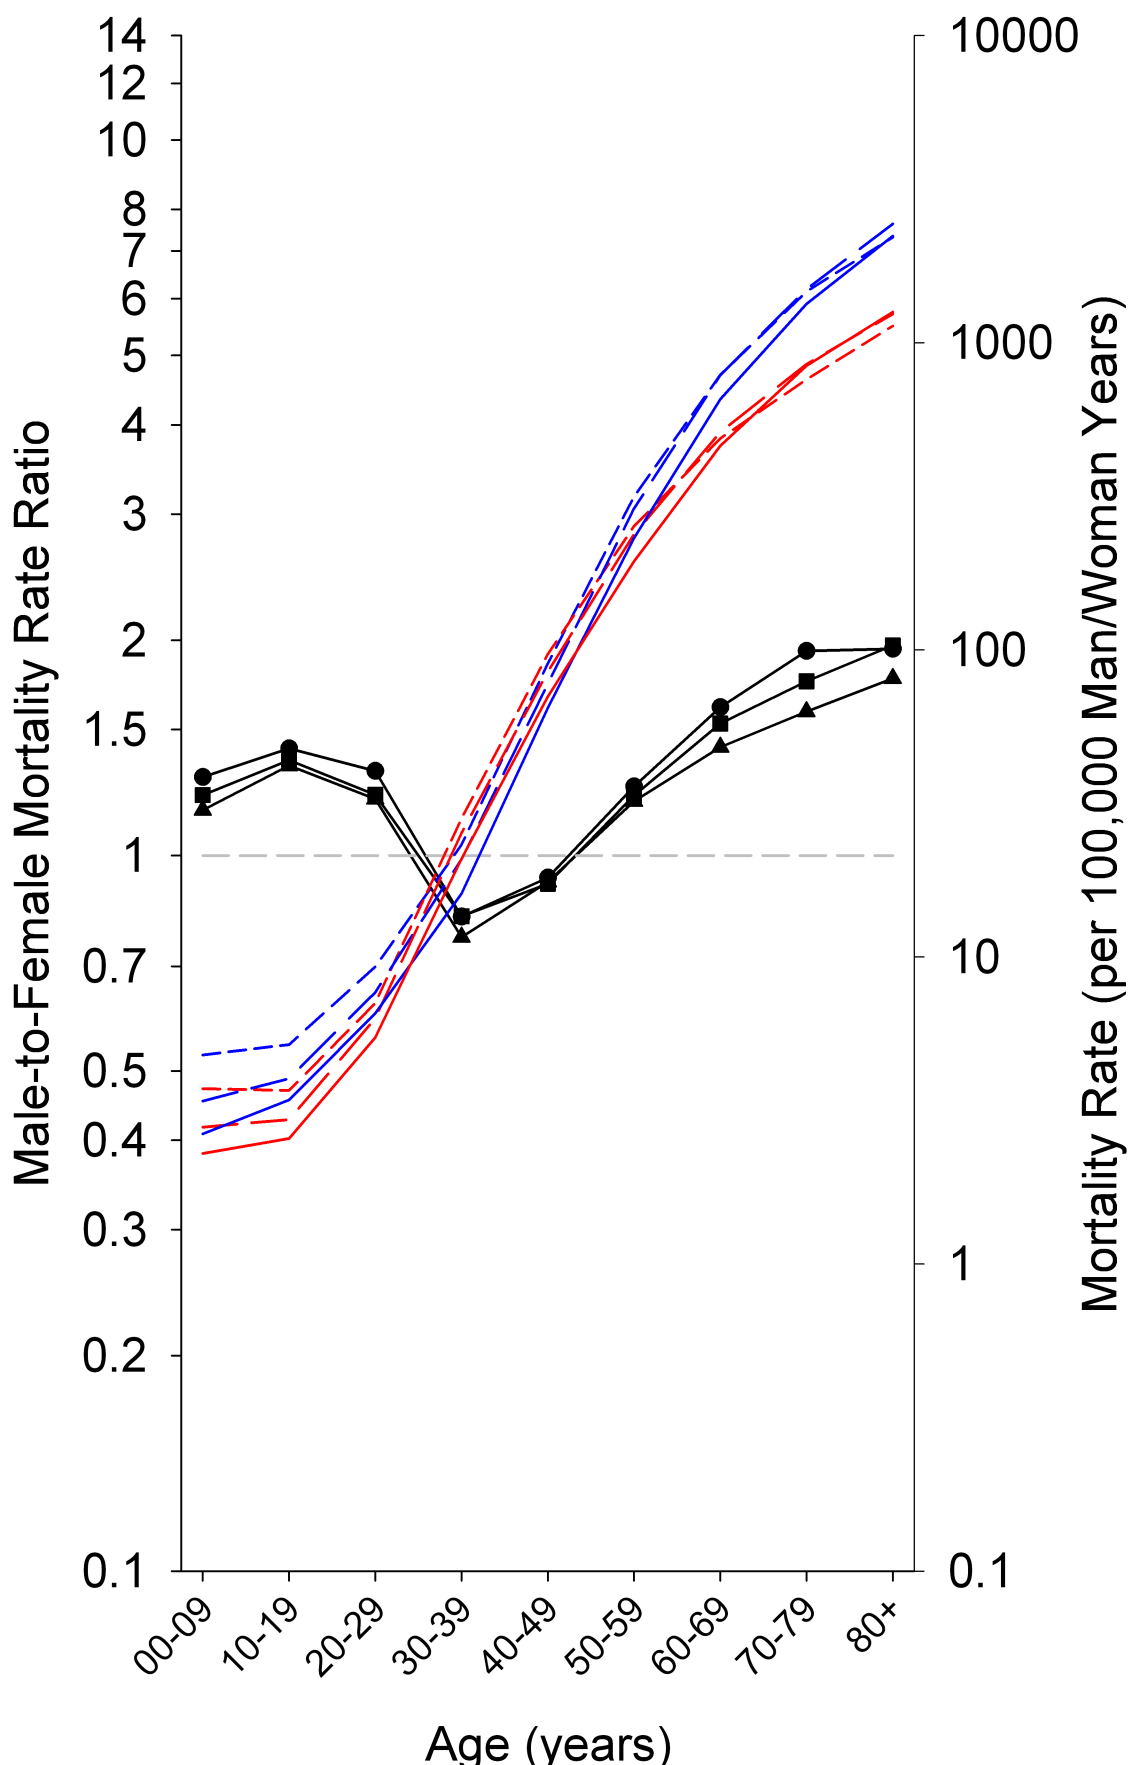

Supplement: NIHMS302507-supplement-2.pdf [file NIHMS302507-supplement-2.pdf]

Male-to-Female MRRs and Sex-Specific Mortality Rates of Myeloma by Age, 1977 to 2006.

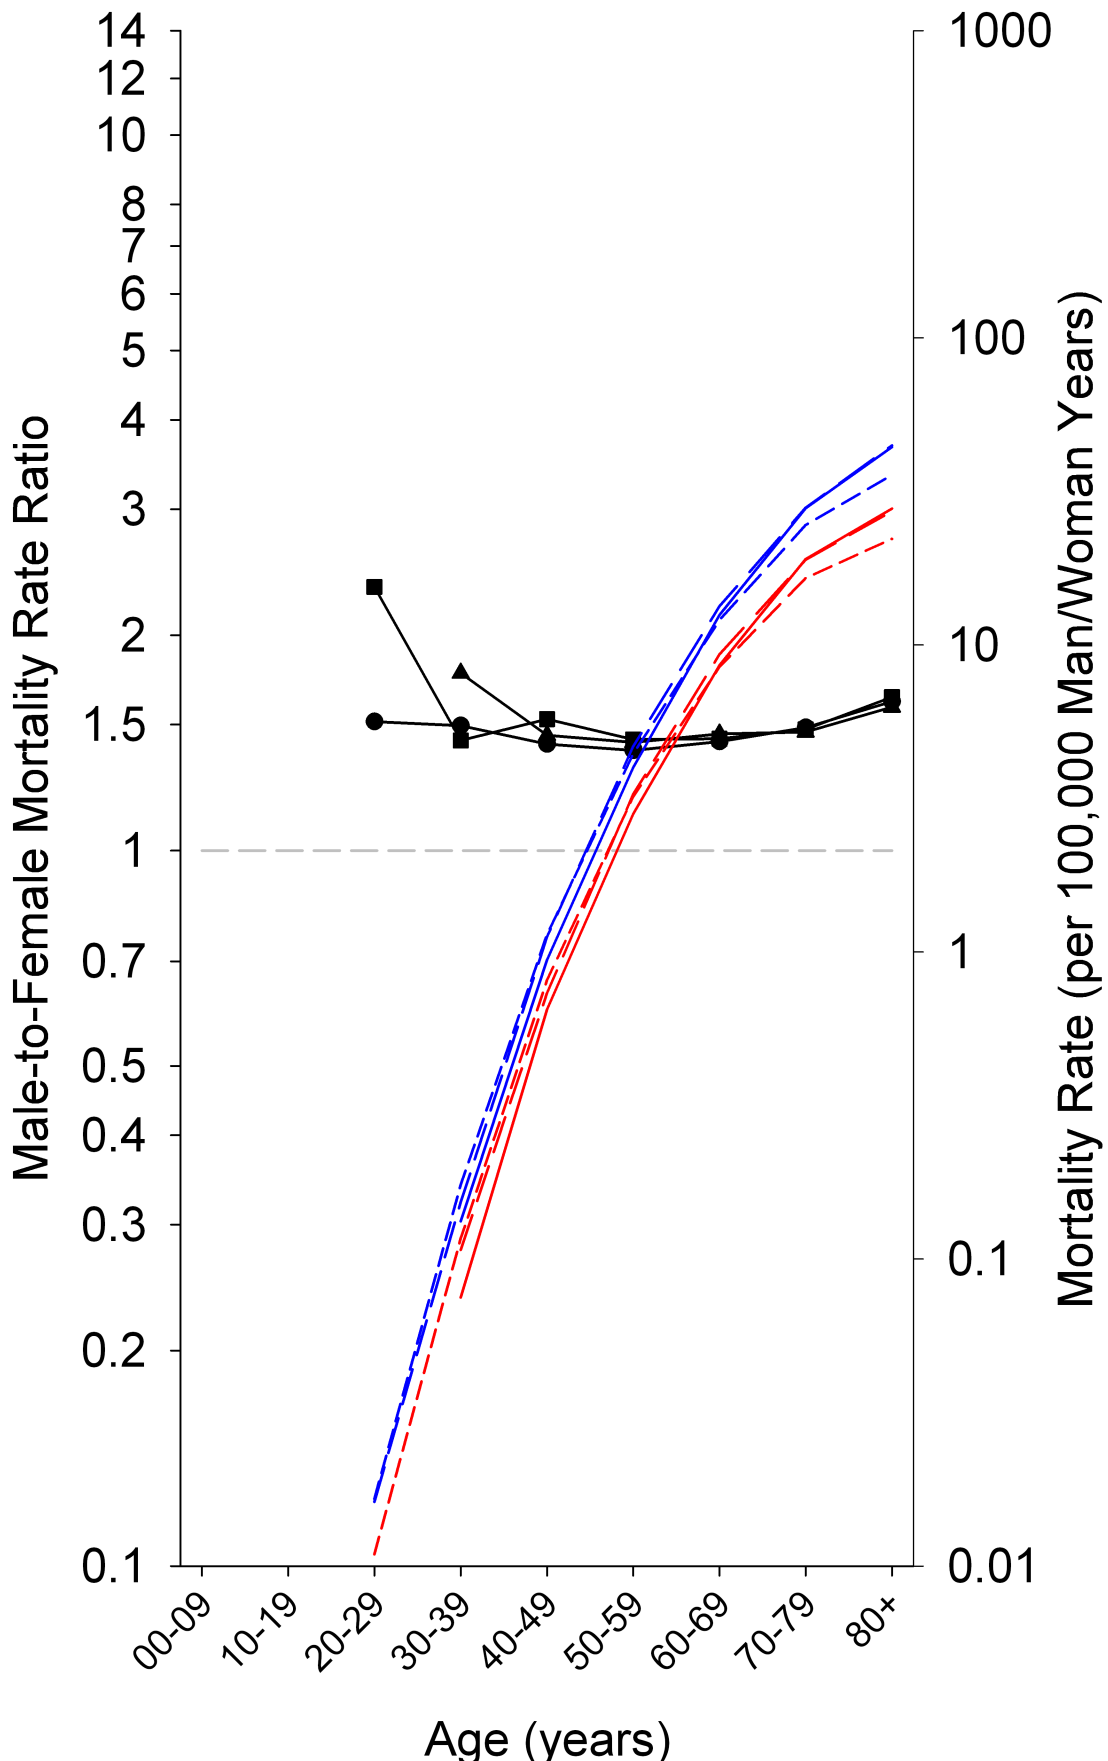

Supplement: NIHMS302507-supplement-20.pdf [file NIHMS302507-supplement-20.pdf]

Male-to-Female MRRs and Sex-Specific Mortality Rates of Nasopharynx by Age, 1977 to 2006.

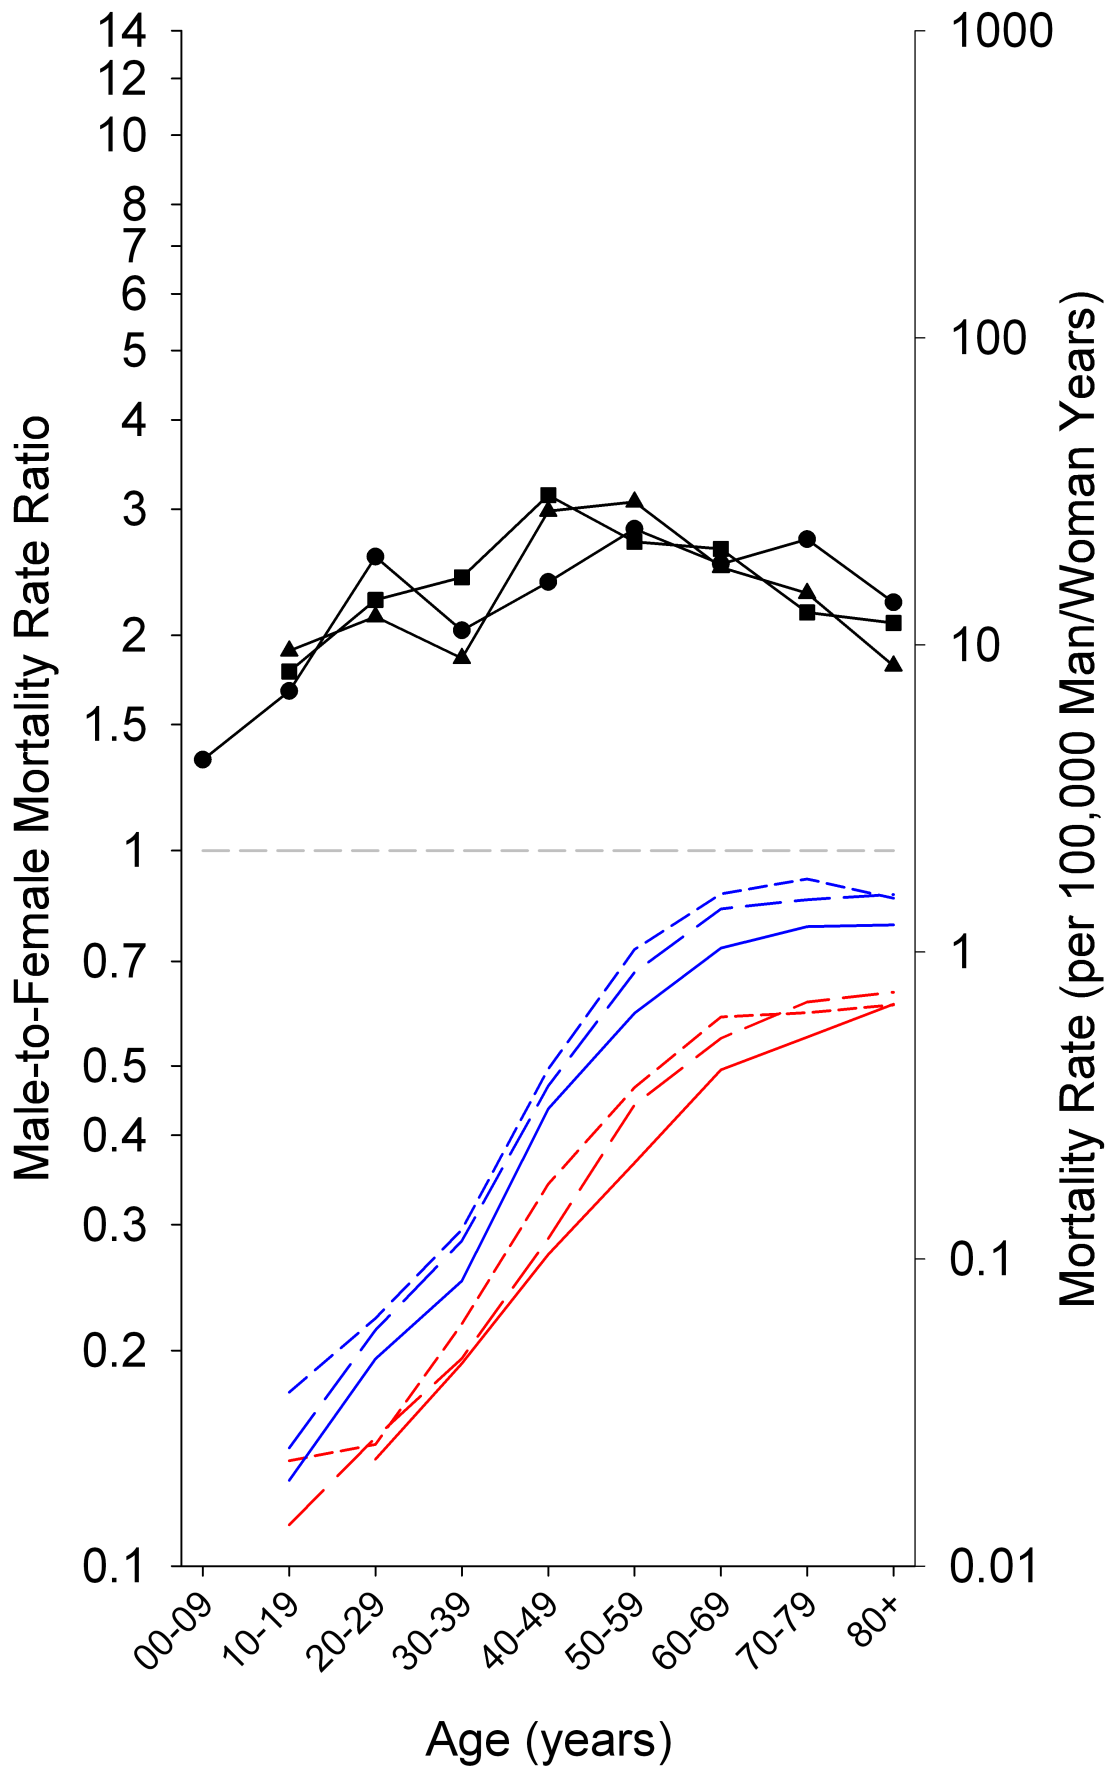

Supplement: NIHMS302507-supplement-21.pdf [file NIHMS302507-supplement-21.pdf]

Male-to-Female MRRs and Sex-Specific Mortality Rates of Oropharynx by Age, 1977 to 2006.

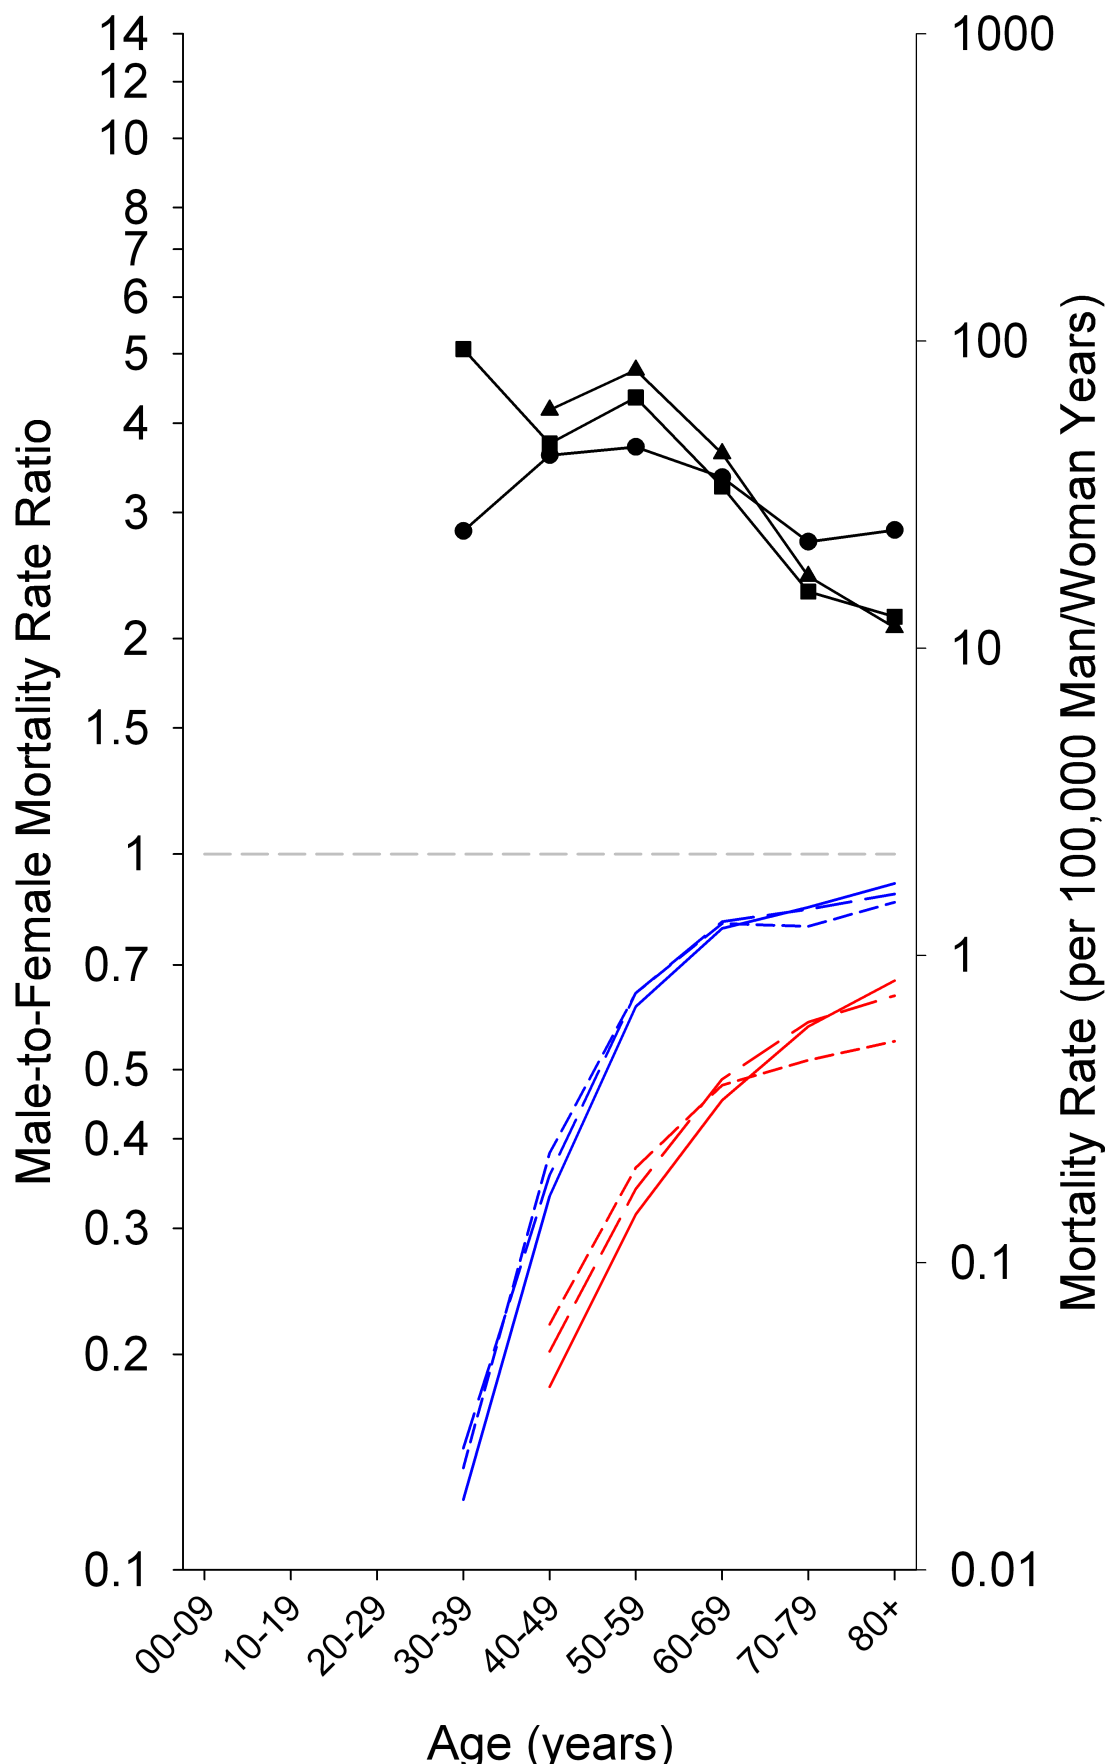

Supplement: NIHMS302507-supplement-23.pdf [file NIHMS302507-supplement-23.pdf]

Male-to-Female MRRs and Sex-Specific Mortality Rates of Other Biliary by Age, 1977 to 2006.

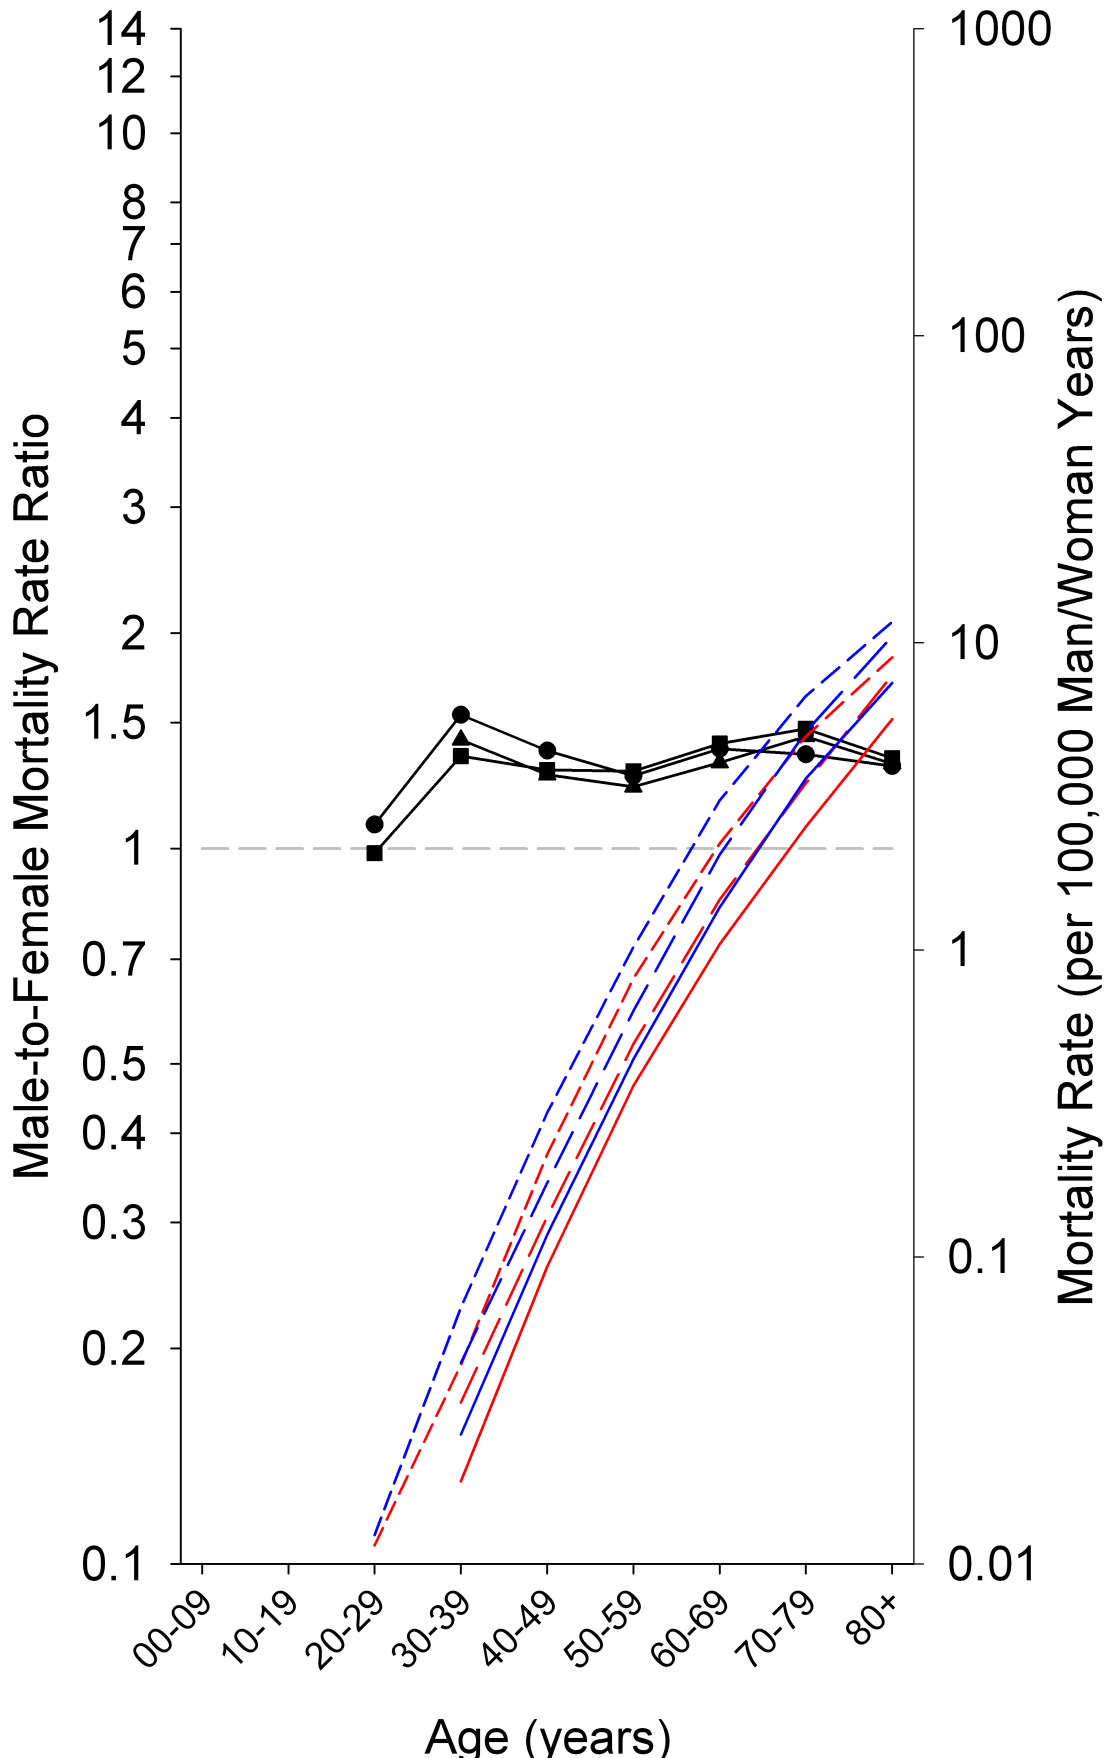

Supplement: NIHMS302507-supplement-24.pdf [file NIHMS302507-supplement-24.pdf]

Male-to-Female MRRs and Sex-Specific Mortality Rates of Pancreas by Age, 1977 to 2006.

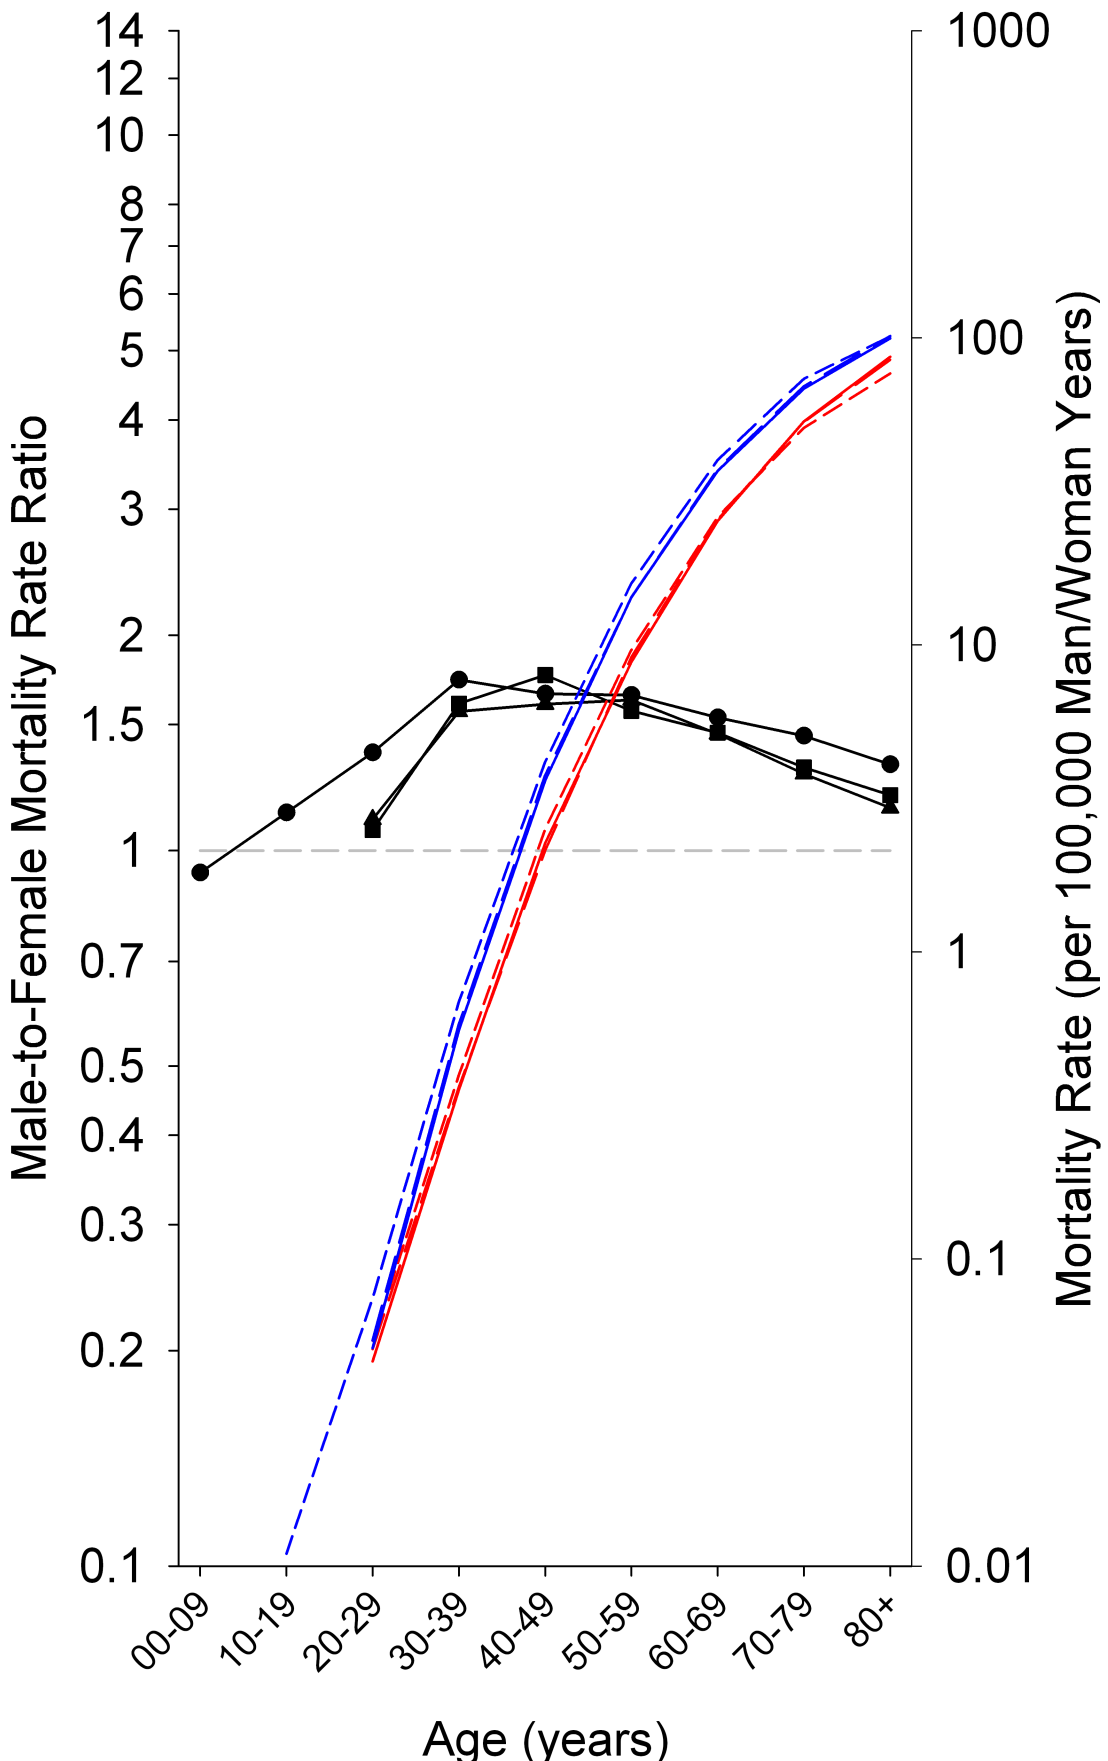

Supplement: NIHMS302507-supplement-25.pdf [file NIHMS302507-supplement-25.pdf]

Male-to-Female MRRs and Sex-Specific Mortality Rates of Retroperitoneum by Age, 1977 to 2006.

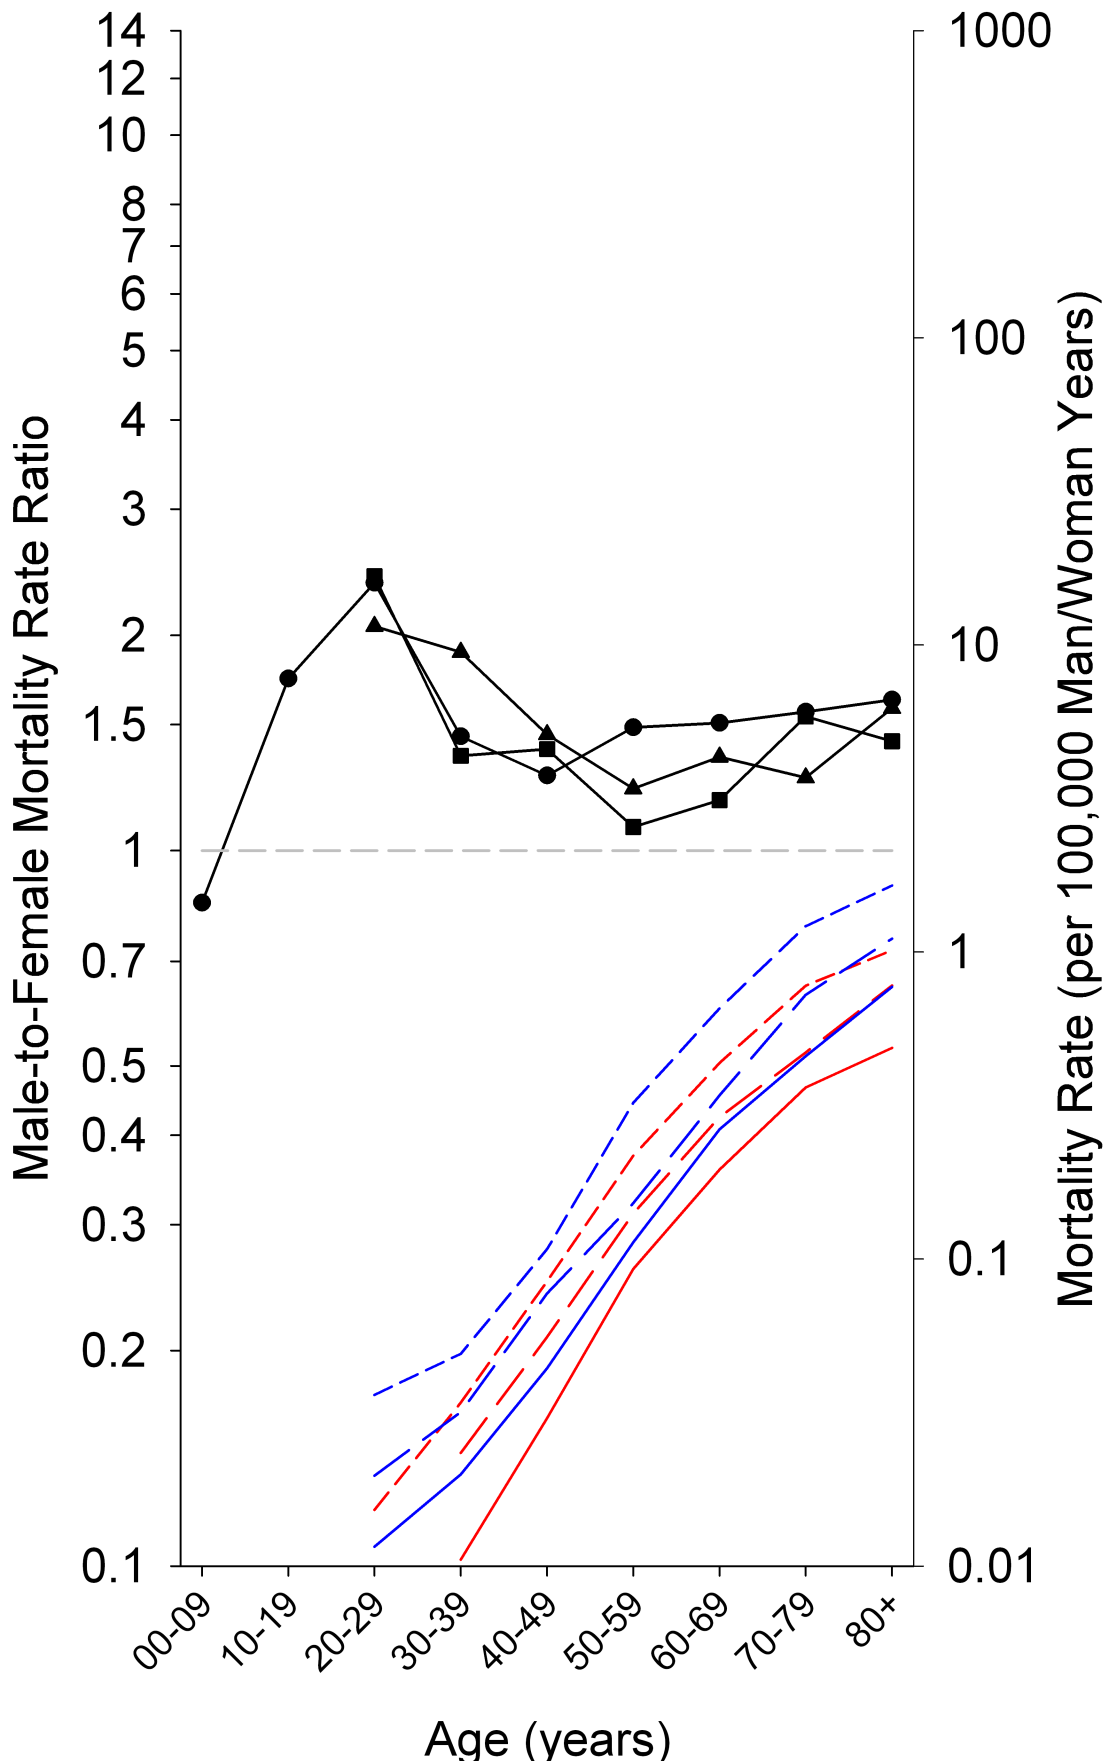

Supplement: NIHMS302507-supplement-27.pdf [file NIHMS302507-supplement-27.pdf]

Male-to-Female MRRs and Sex-Specific Mortality Rates of Salivary Gland by Age, 1977 to 2006.

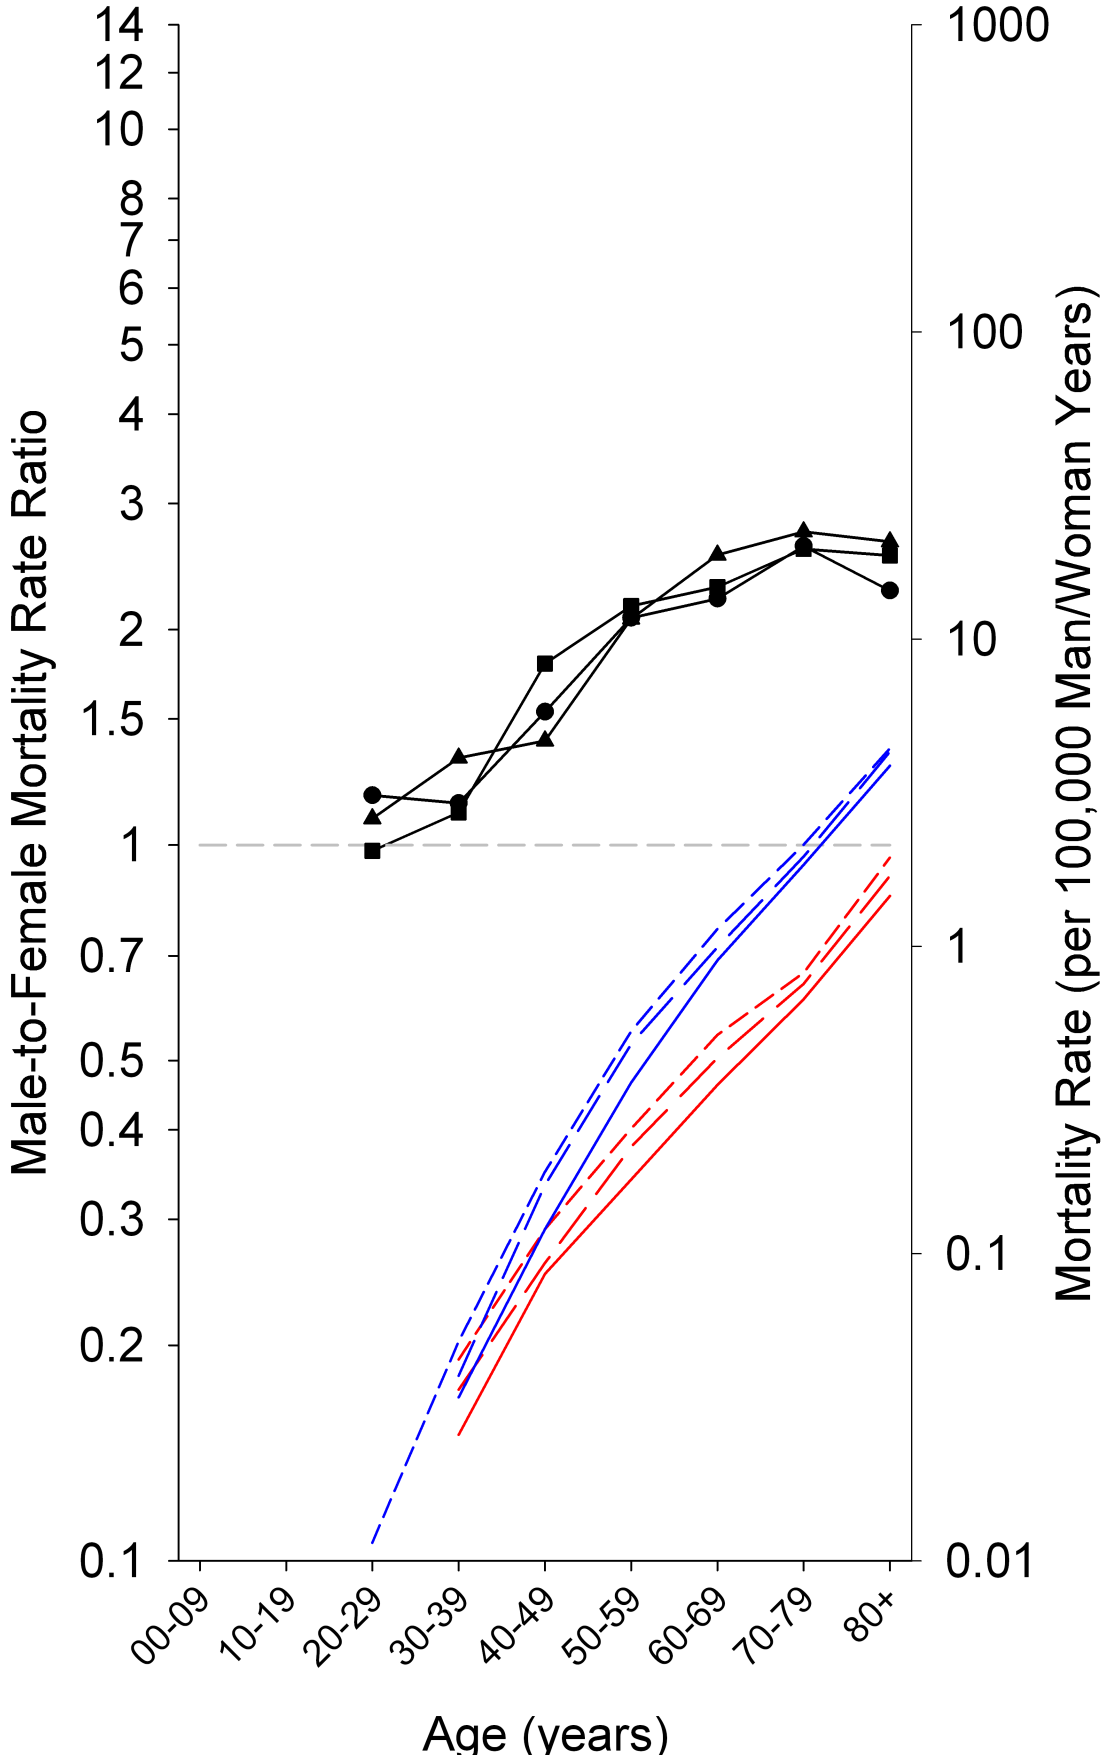

Supplement: NIHMS302507-supplement-28.pdf [file NIHMS302507-supplement-28.pdf]

Male-to-Female MRRs and Sex-Specific Mortality Rates of Small Intestine by Age, 1977 to 2006.

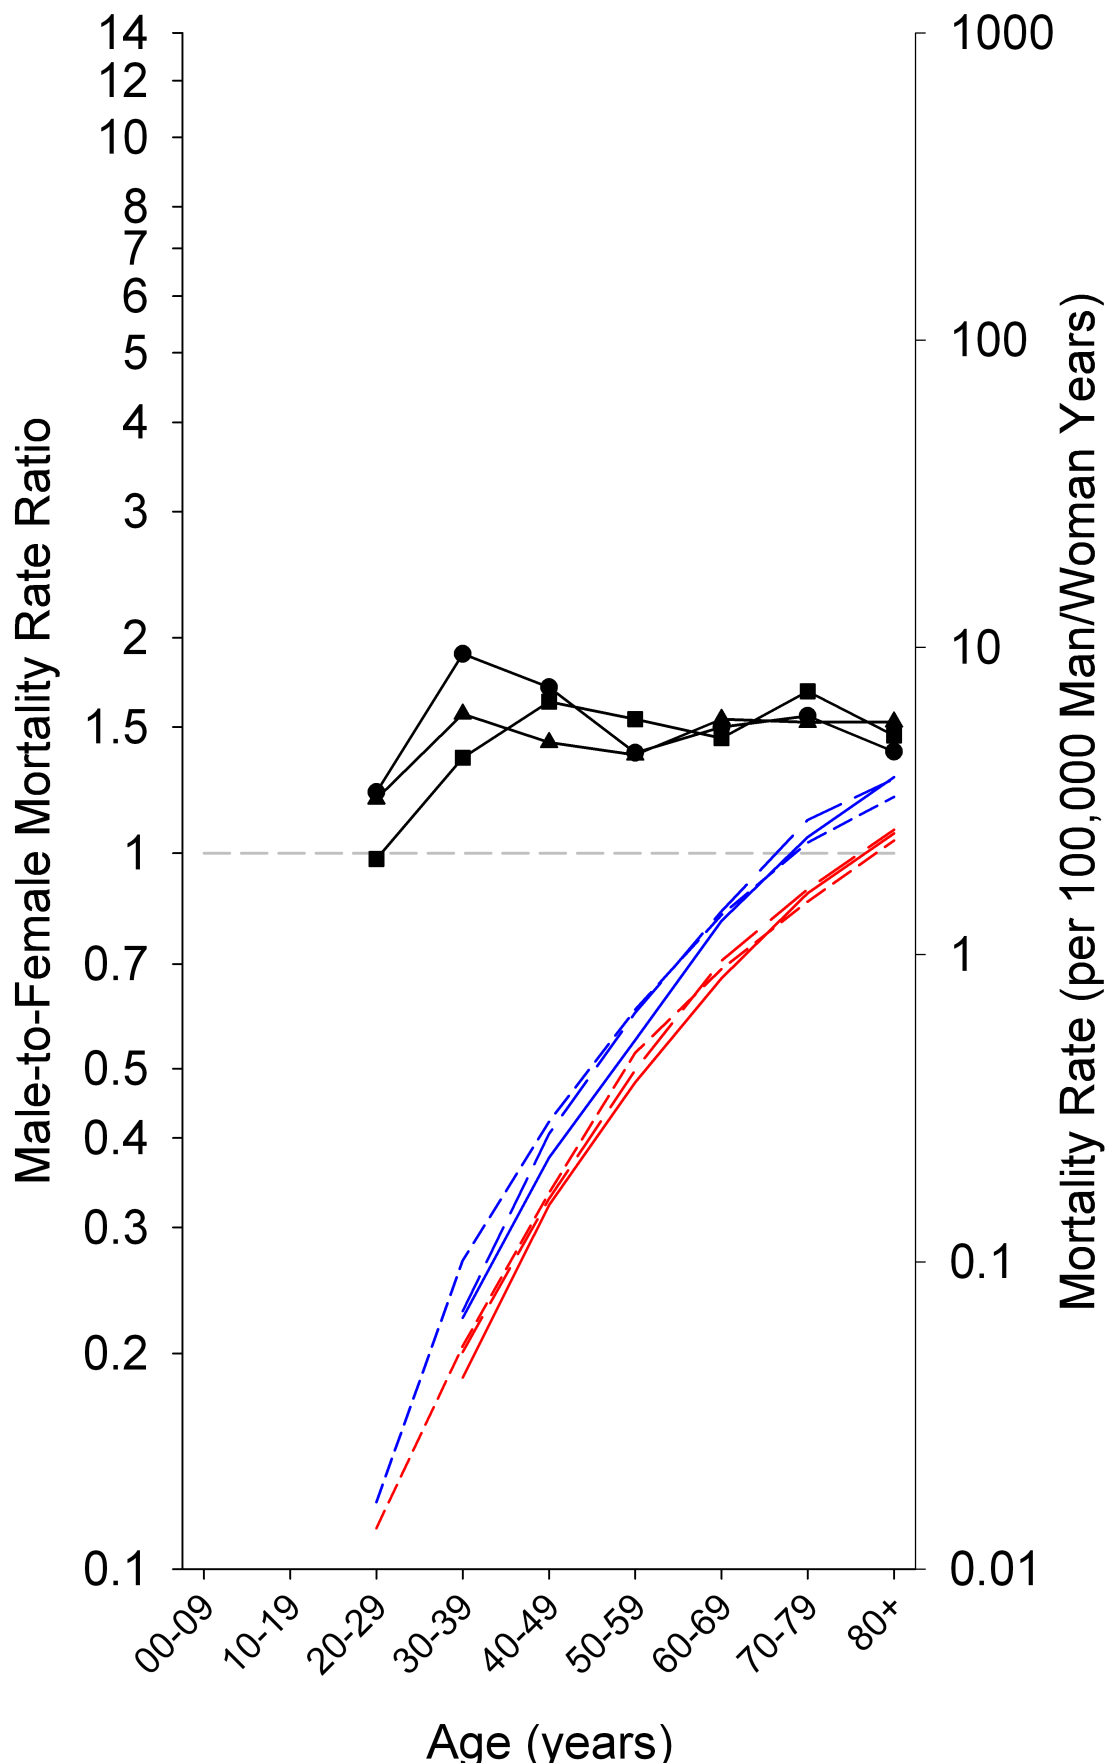

Supplement: NIHMS302507-supplement-29.pdf [file NIHMS302507-supplement-29.pdf]

Male-to-Female MRRs and Sex-Specific Mortality Rates of Soft Tissue including Heart by Age, 1977 to 2006.

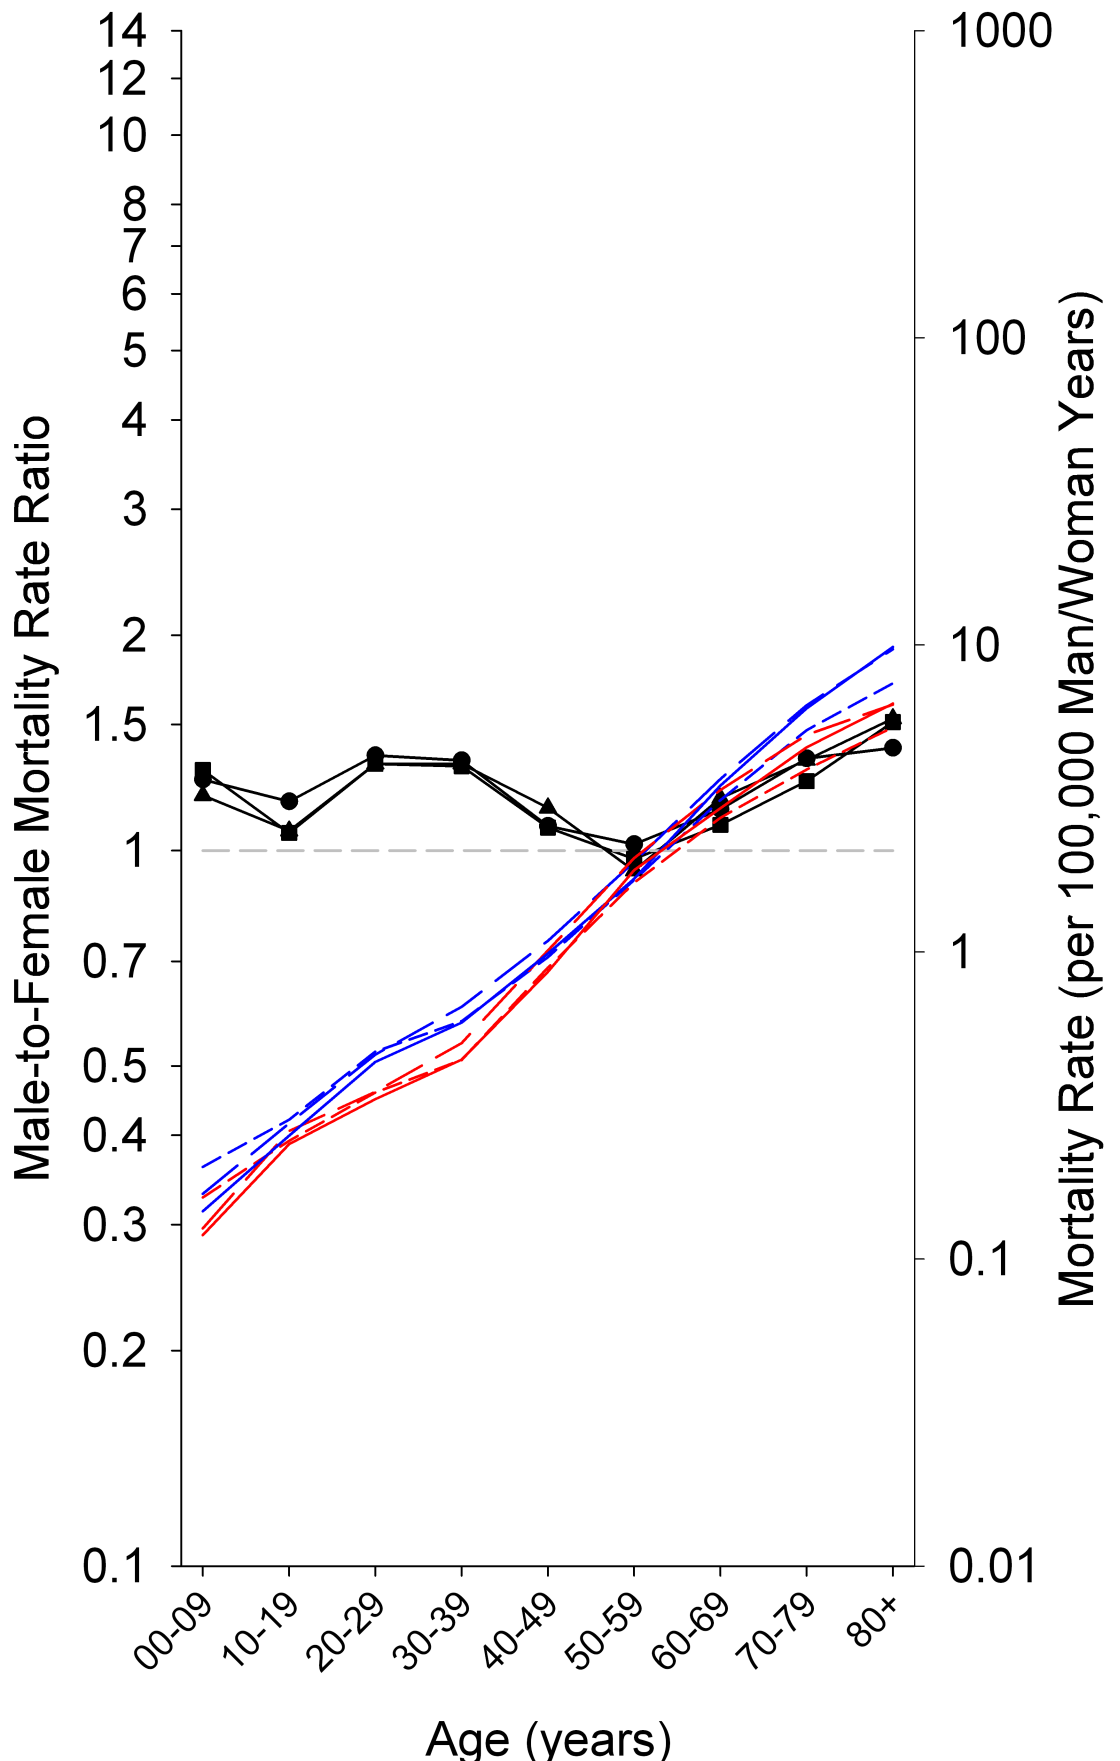

Supplement: NIHMS302507-supplement-30.pdf [file NIHMS302507-supplement-30.pdf]

Male-to-Female MRRs and Sex-Specific Mortality Rates of Stomach by Age, 1977 to 2006.

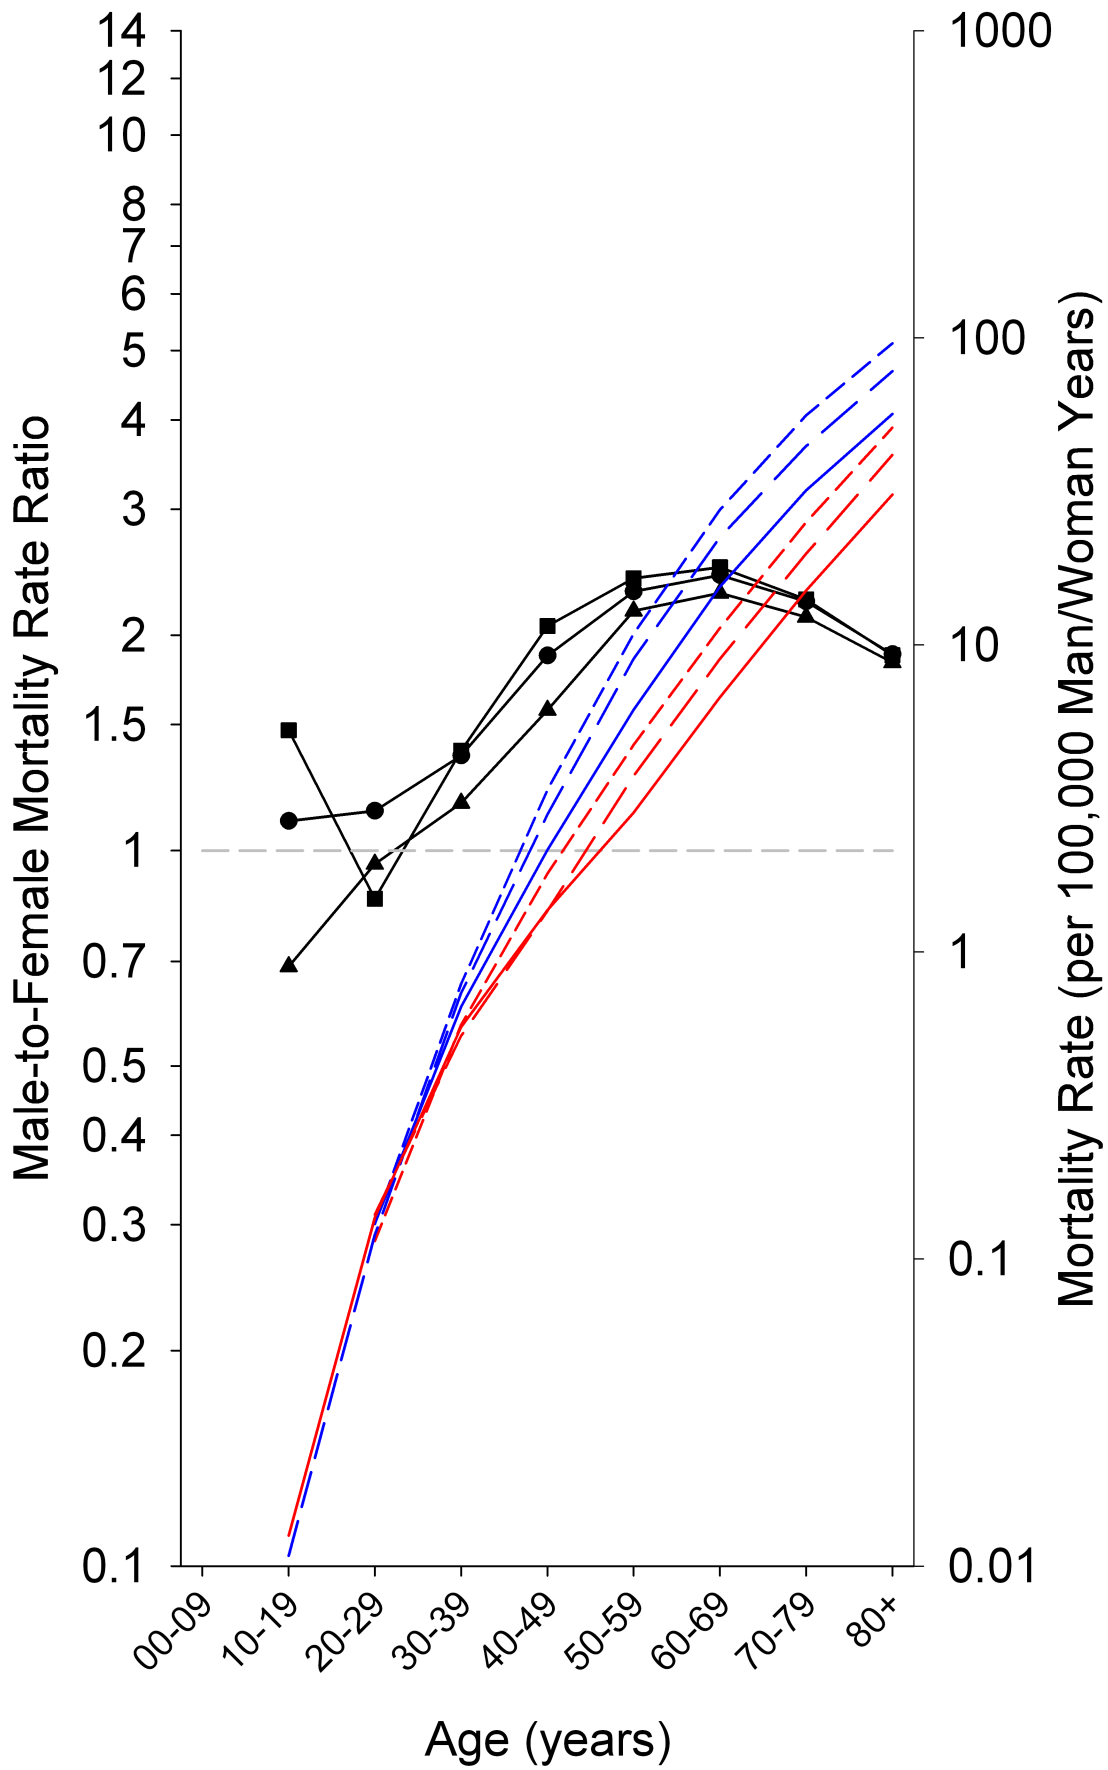

Supplement: NIHMS302507-supplement-31.pdf [file NIHMS302507-supplement-31.pdf]

Male-to-Female MRRs and Sex-Specific Mortality Rates of Tongue by Age, 1977 to 2006.

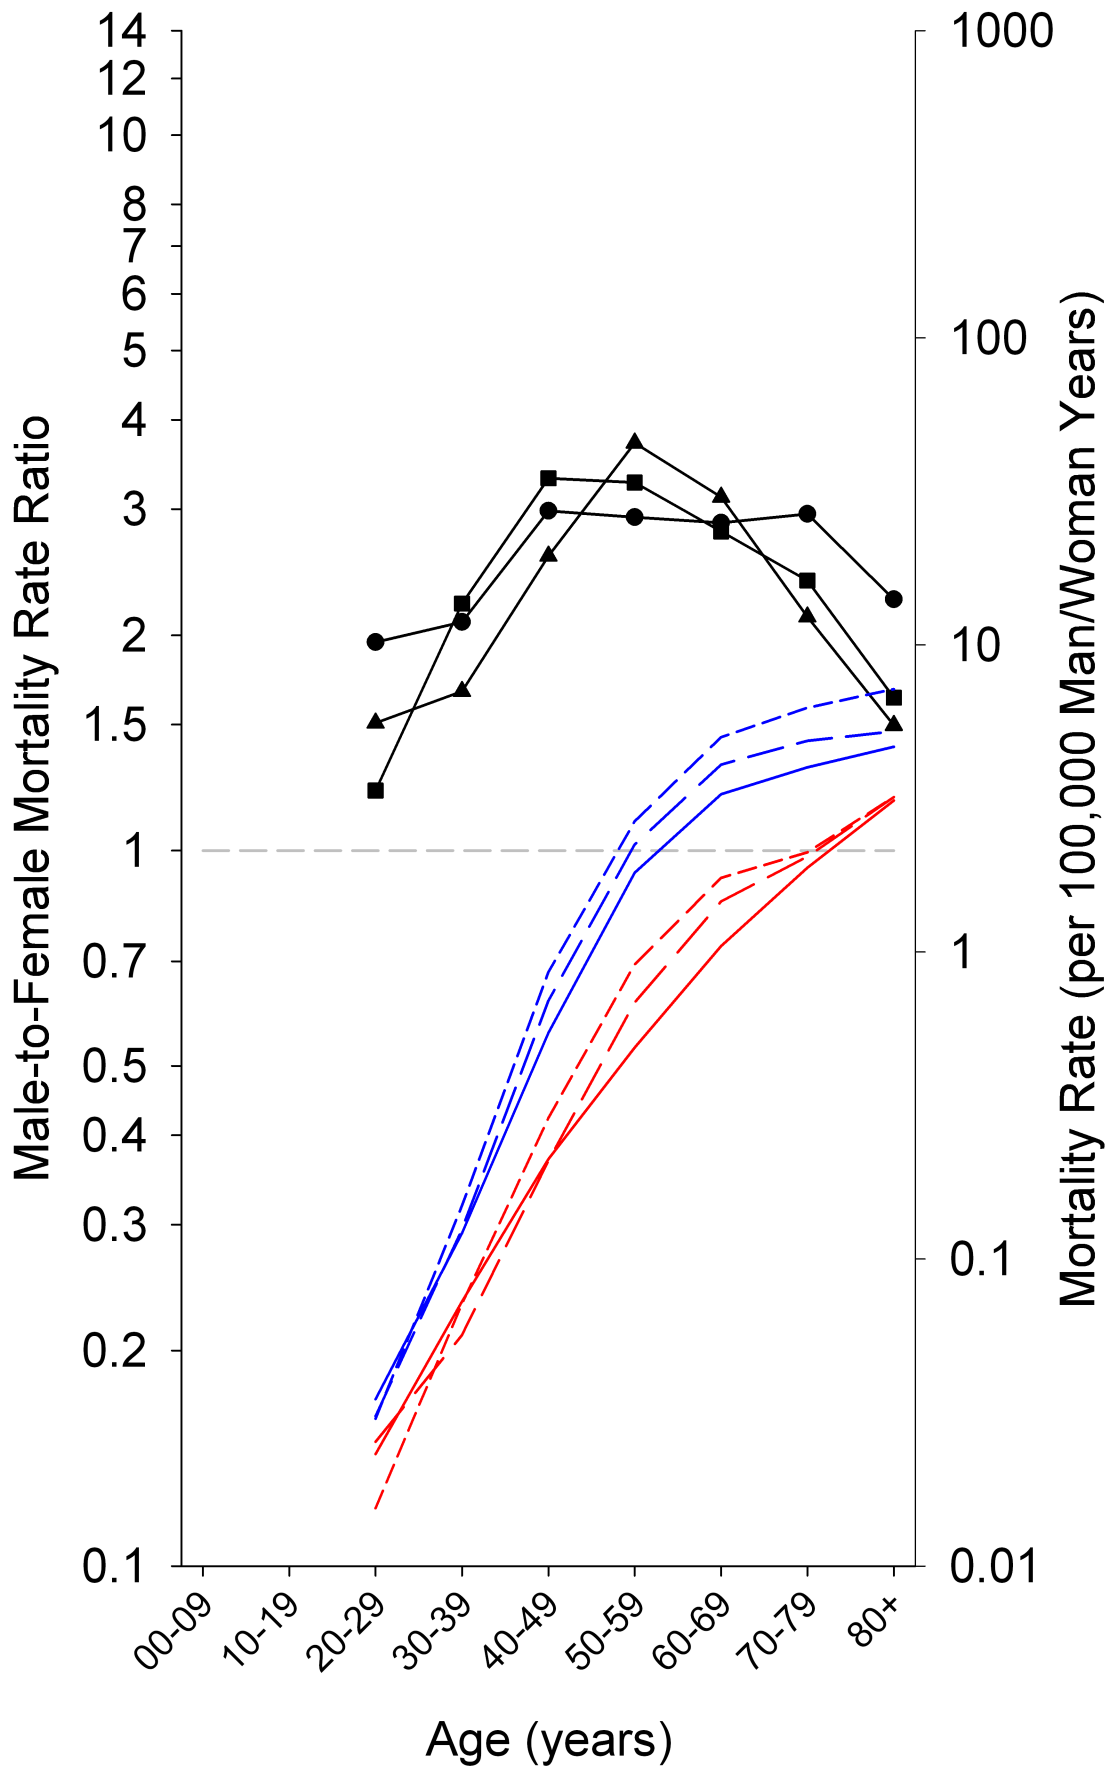

Supplement: NIHMS302507-supplement-32.pdf [file NIHMS302507-supplement-32.pdf]

Male-to-Female MRRs and Sex-Specific Mortality Rates of Tonsil by Age, 1977 to 2006.

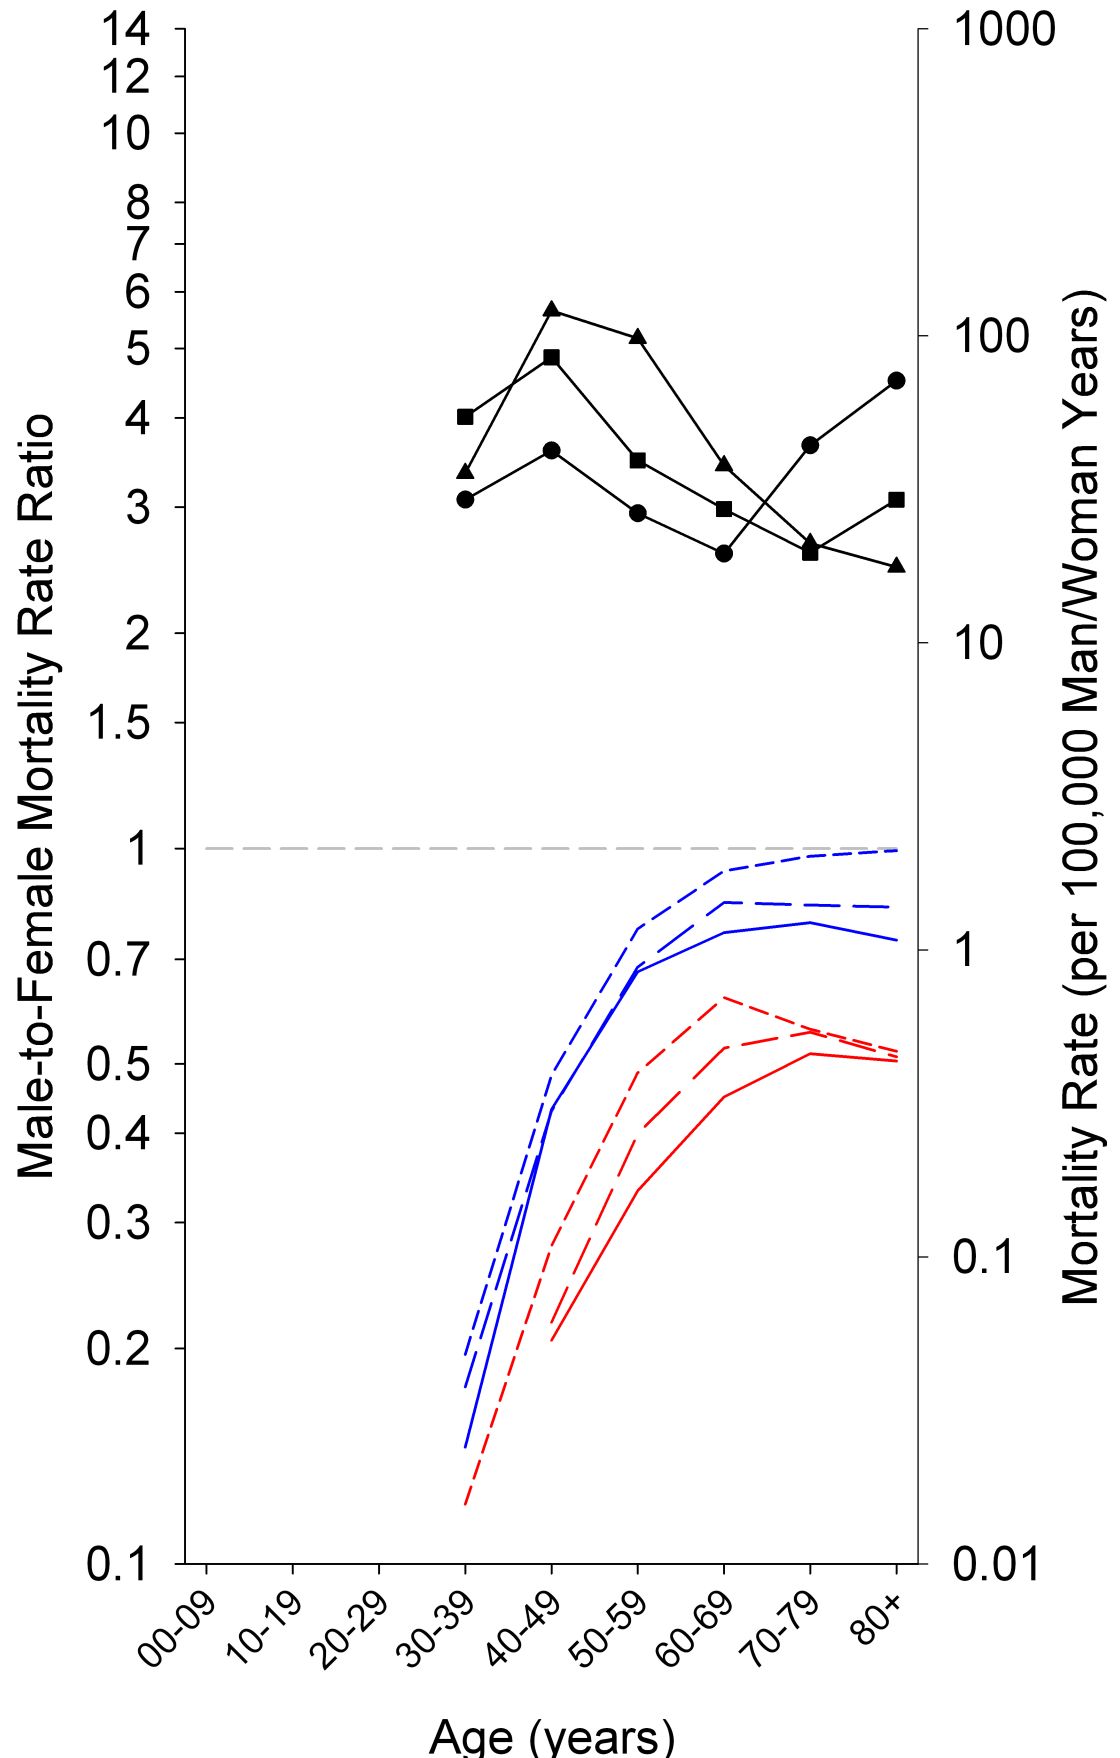

Supplement: NIHMS302507-supplement-33.pdf [file NIHMS302507-supplement-33.pdf]

Male-to-Female MRRs and Sex-Specific Mortality Rates of Ureter by Age, 1977 to 2006.

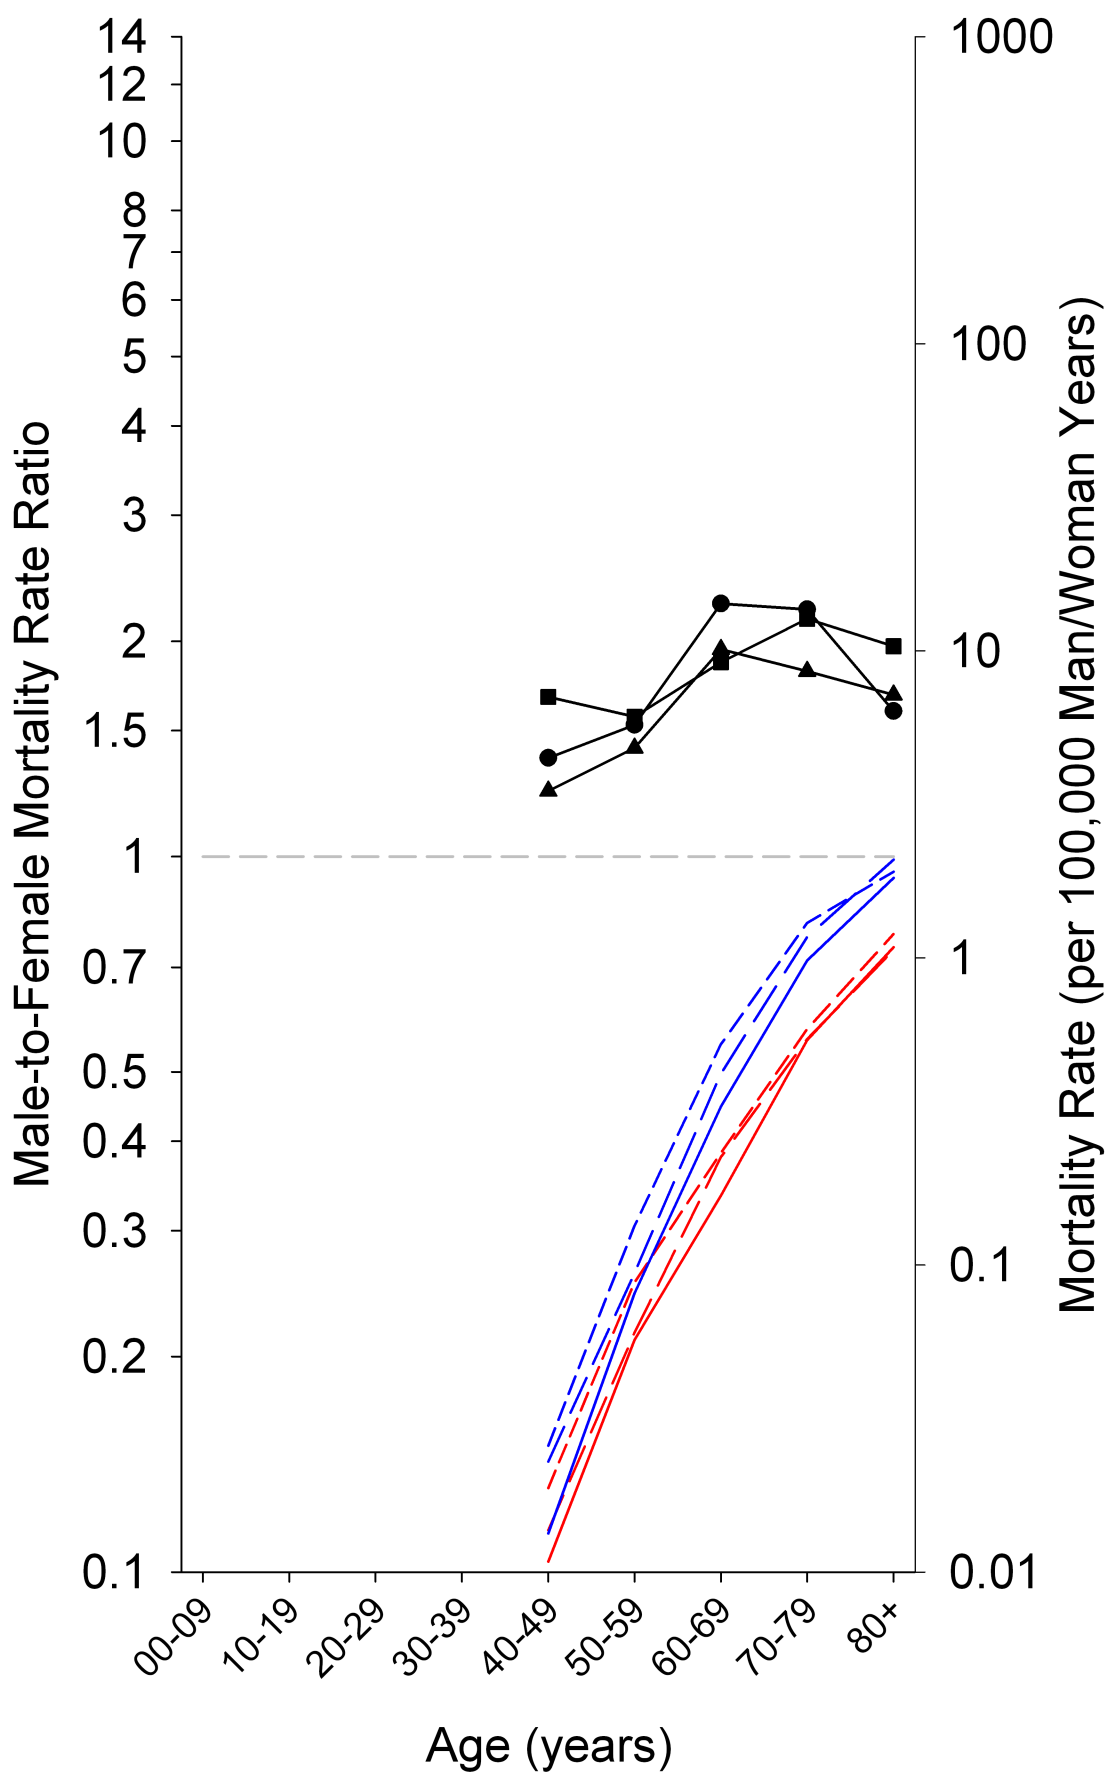

Supplement: NIHMS302507-supplement-35.pdf [file NIHMS302507-supplement-35.pdf]

Male-to-Female MRRs and Sex-Specific Mortality Rates of Urinary Bladder by Age, 1977 to 2006.

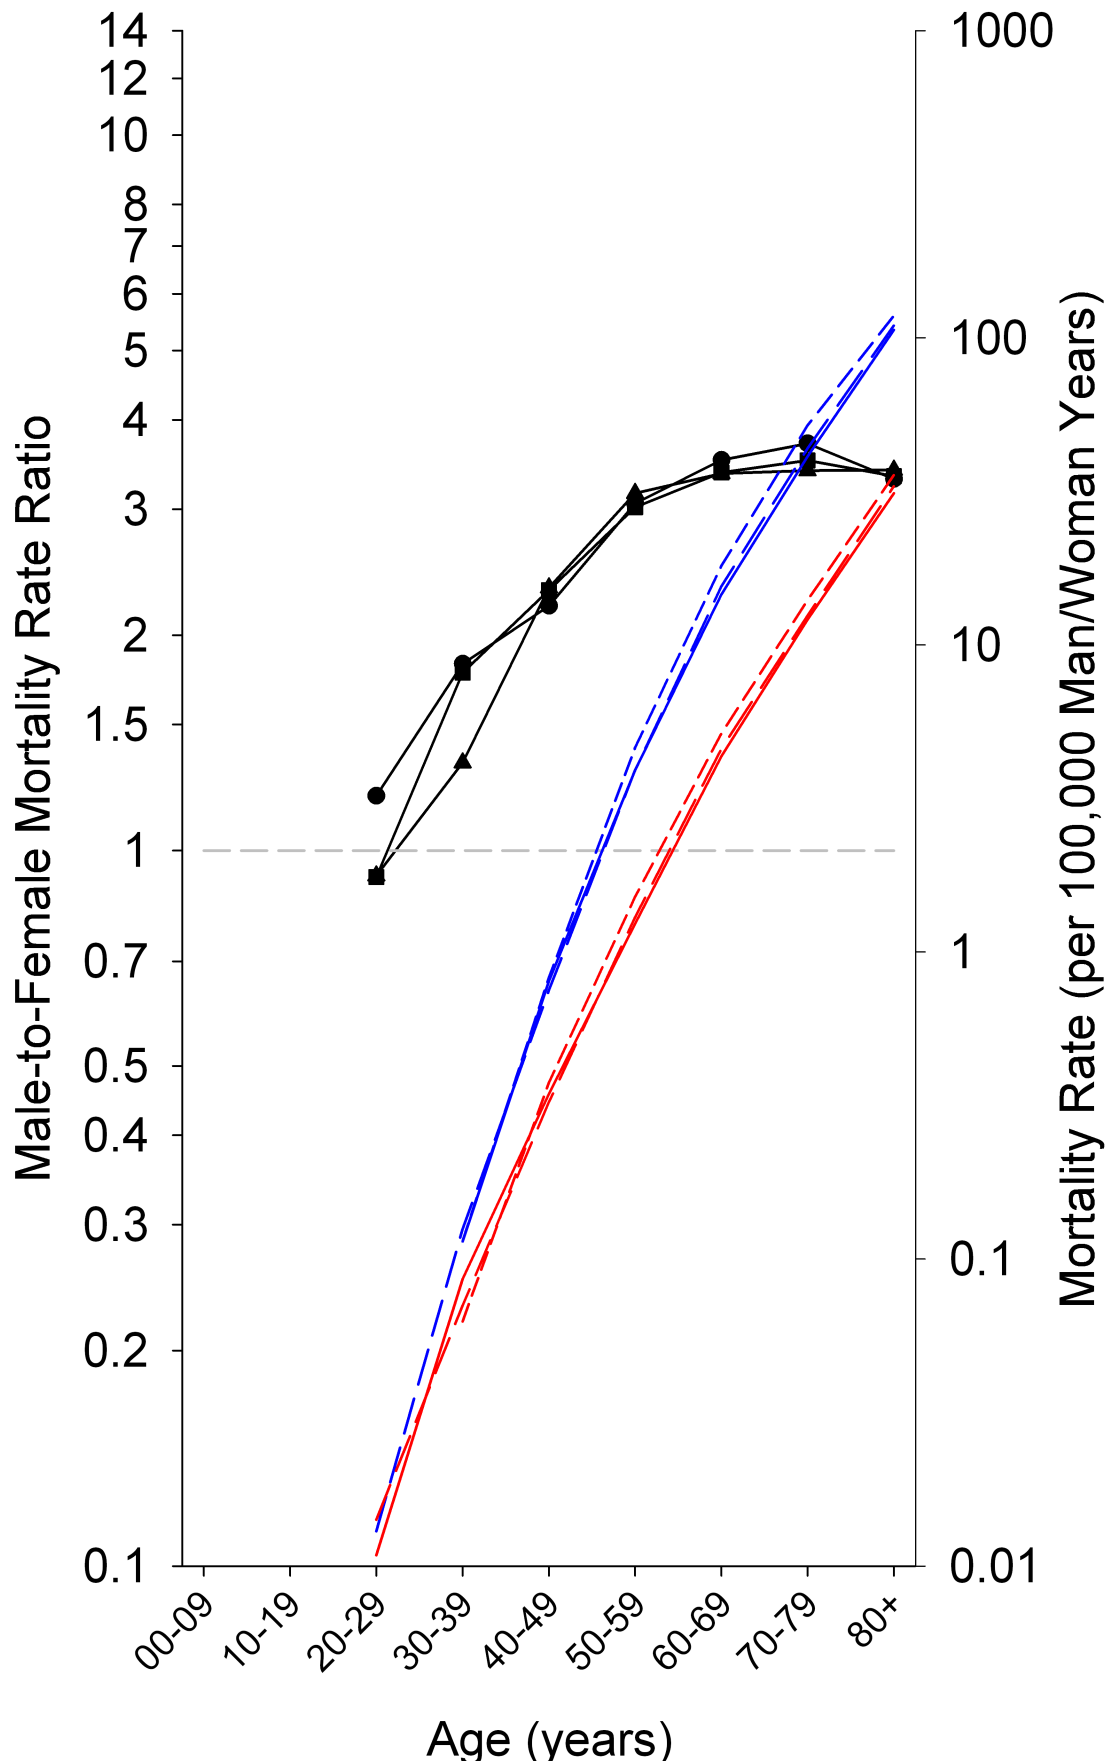

Supplement: NIHMS302507-supplement-36.pdf [file NIHMS302507-supplement-36.pdf]

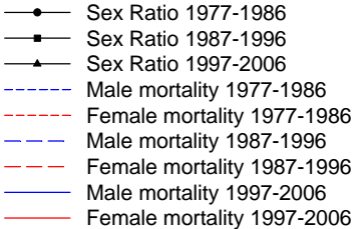

Supplement: NIHMS302507-supplement-37.pdf [file NIHMS302507-supplement-37.pdf]

# Male-to-Female MRRs and Sex-Specific Mortality Rates of Anus, Anal Canal and Anorectum by Age, 1977 to 2006.

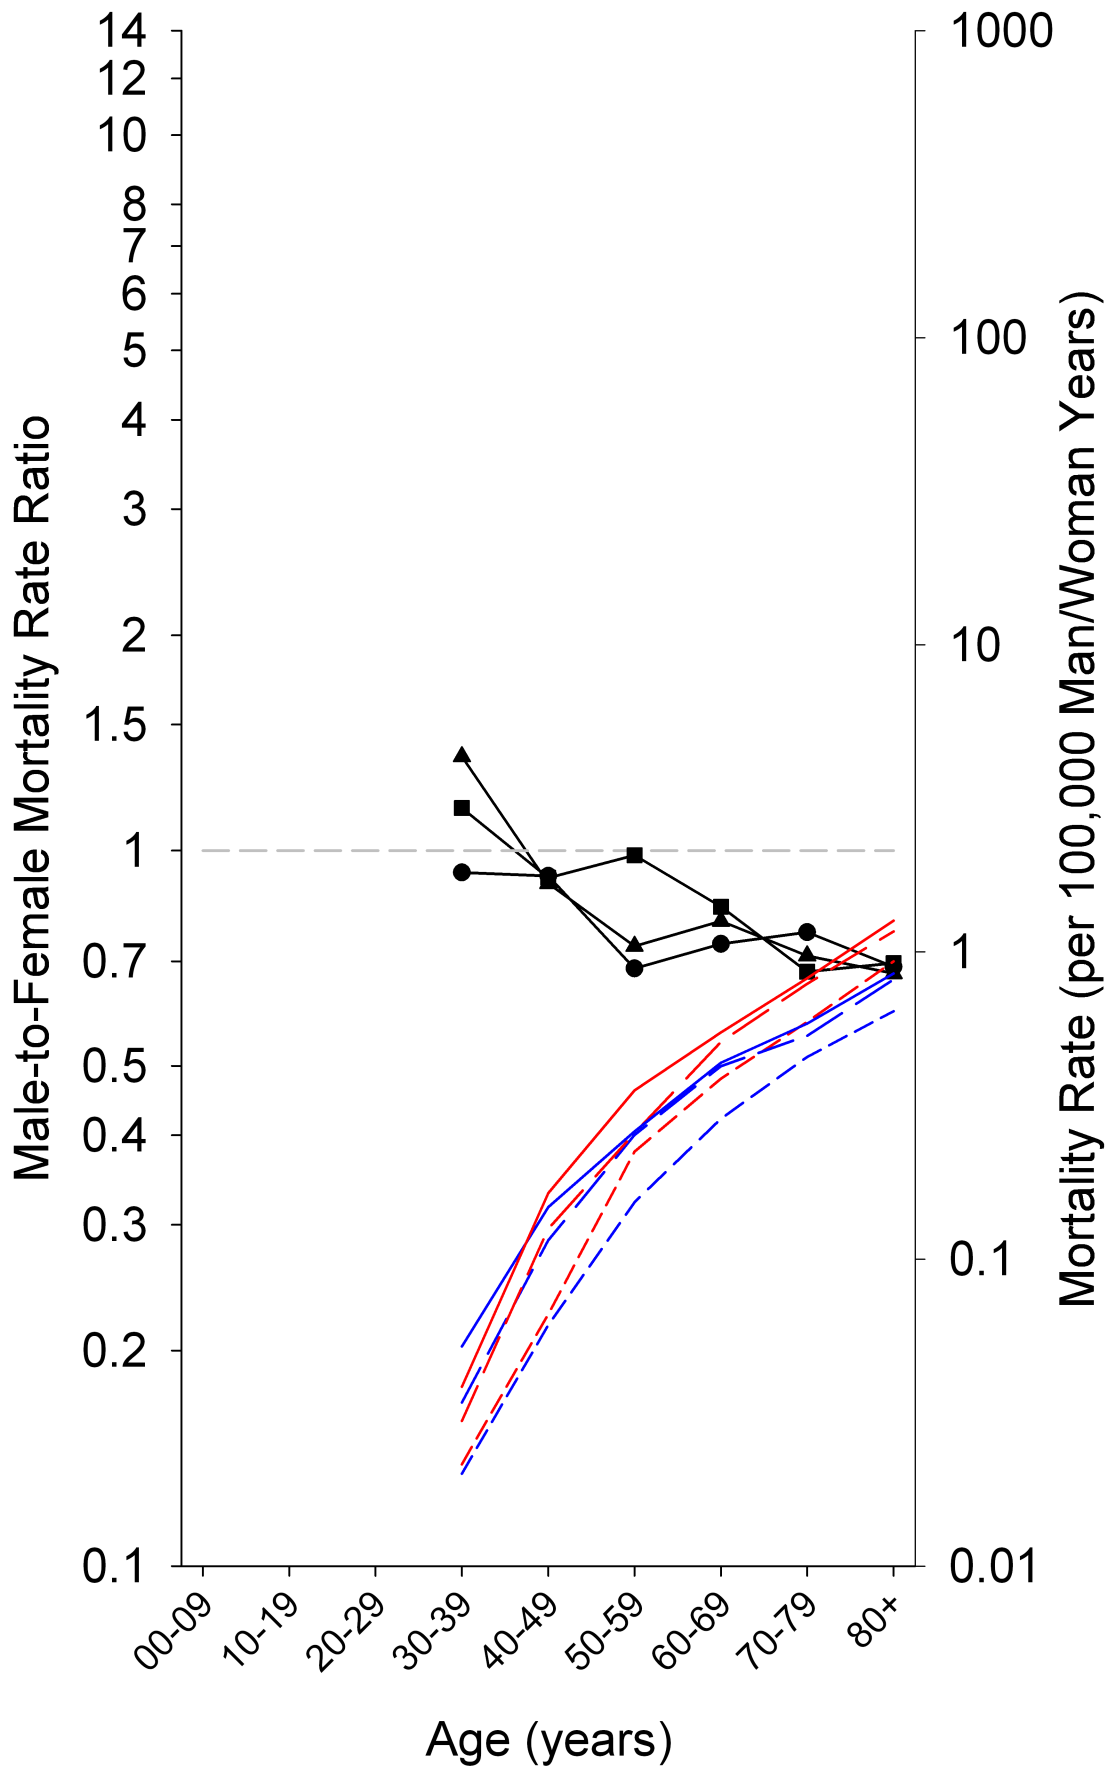

Supplement: NIHMS302507-supplement-5.pdf [file NIHMS302507-supplement-5.pdf]

Male-to-Female MRRs and Sex-Specific Mortality Rates of Bones and Joints by Age, 1977 to 2006.

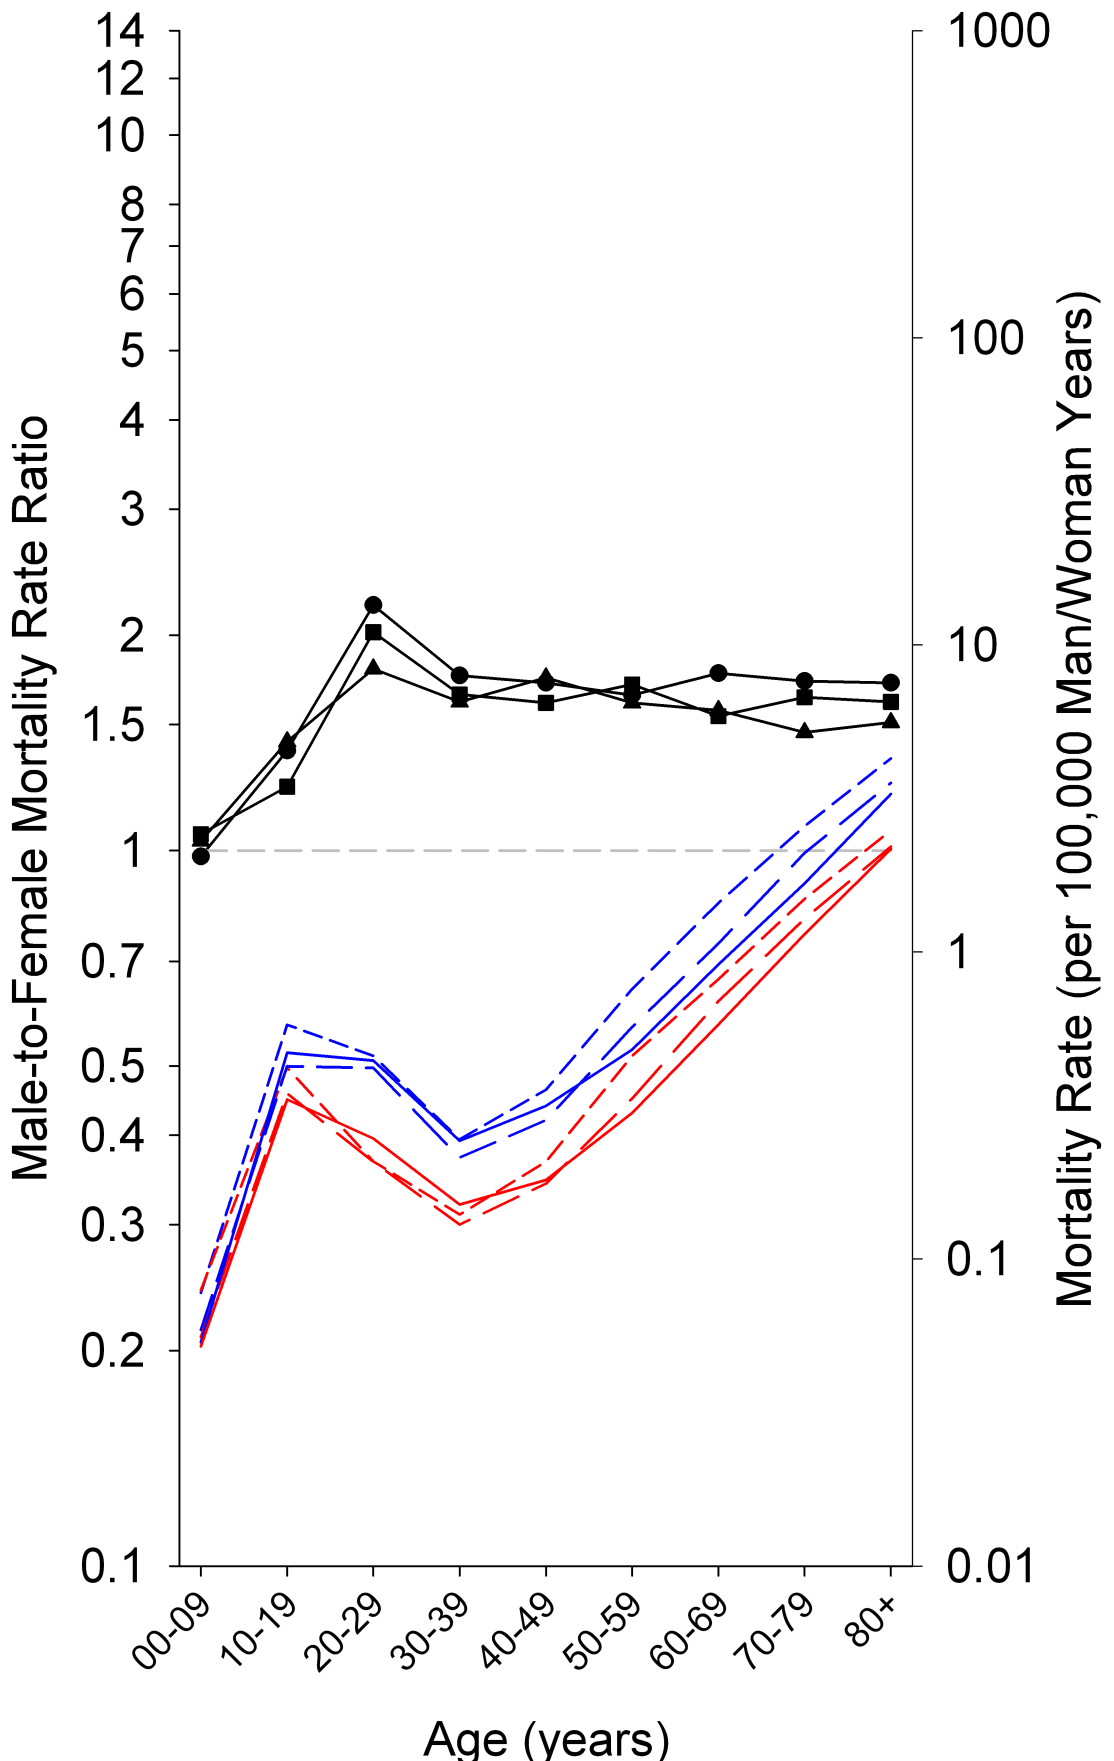

Supplement: NIHMS302507-supplement-6.pdf [file NIHMS302507-supplement-6.pdf]

Male-to-Female MRRs and Sex-Specific Mortality Rates of Brain and Other Nervous System by Age, 1977 to 2006.

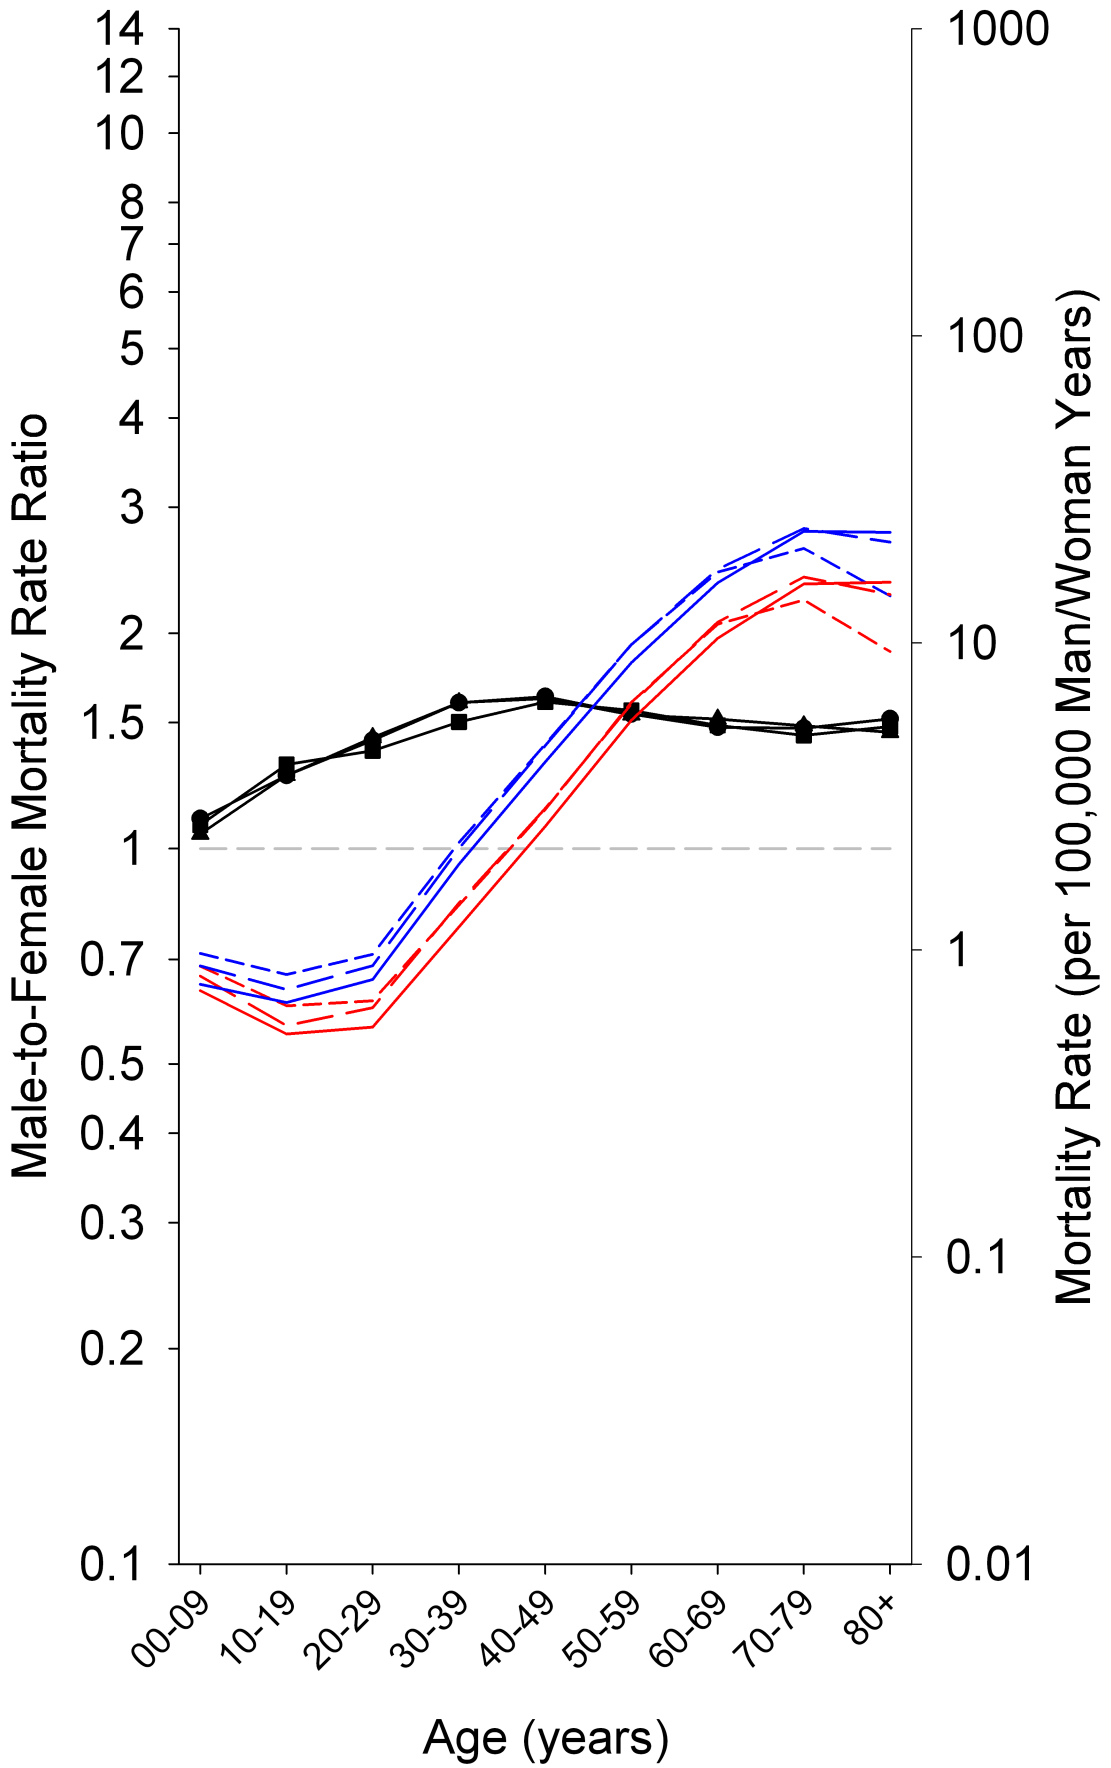

Supplement: NIHMS302507-supplement-7.pdf [file NIHMS302507-supplement-7.pdf]

Male-to-Female MRRs and Sex-Specific Mortality Rates of Colon and Rectum by Age, 1977 to 2006.

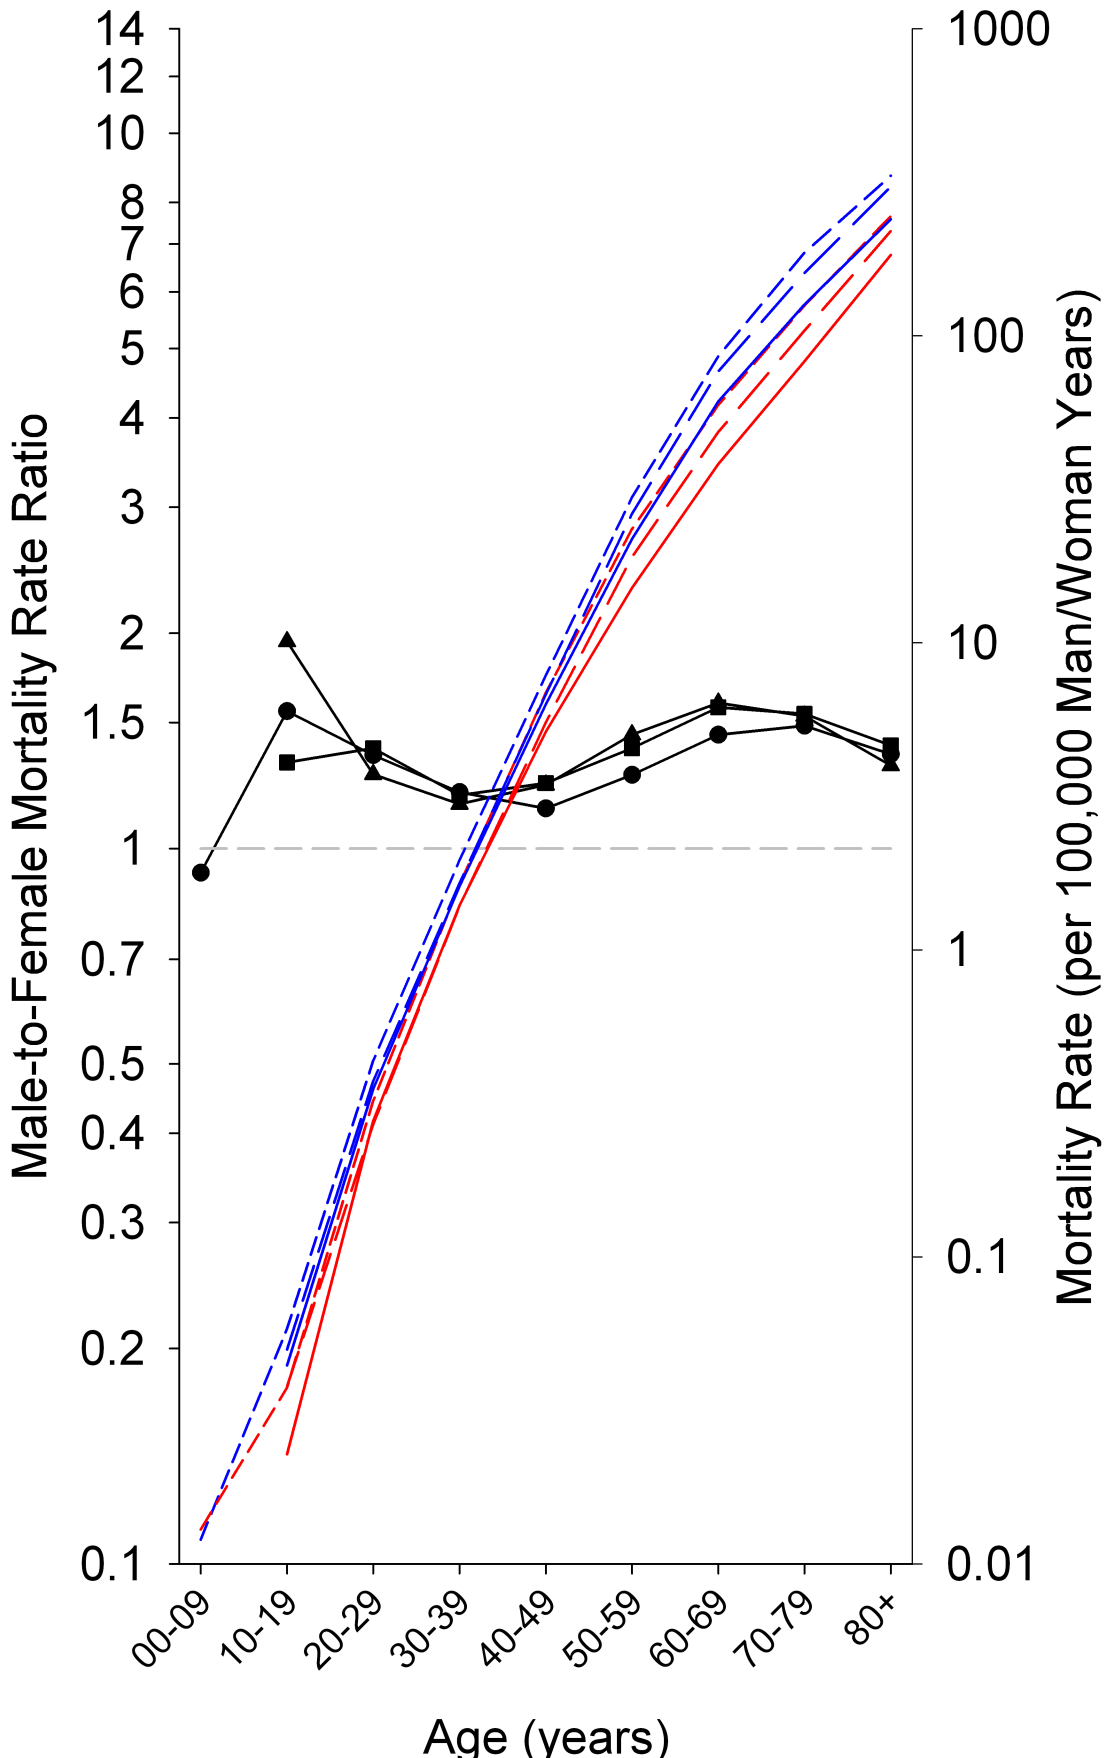

Supplement: NIHMS302507-supplement-8.pdf [file NIHMS302507-supplement-8.pdf]

Male-to-Female MRRs and Sex-Specific Mortality Rates of Endocrine System by Age, 1977 to 2006.

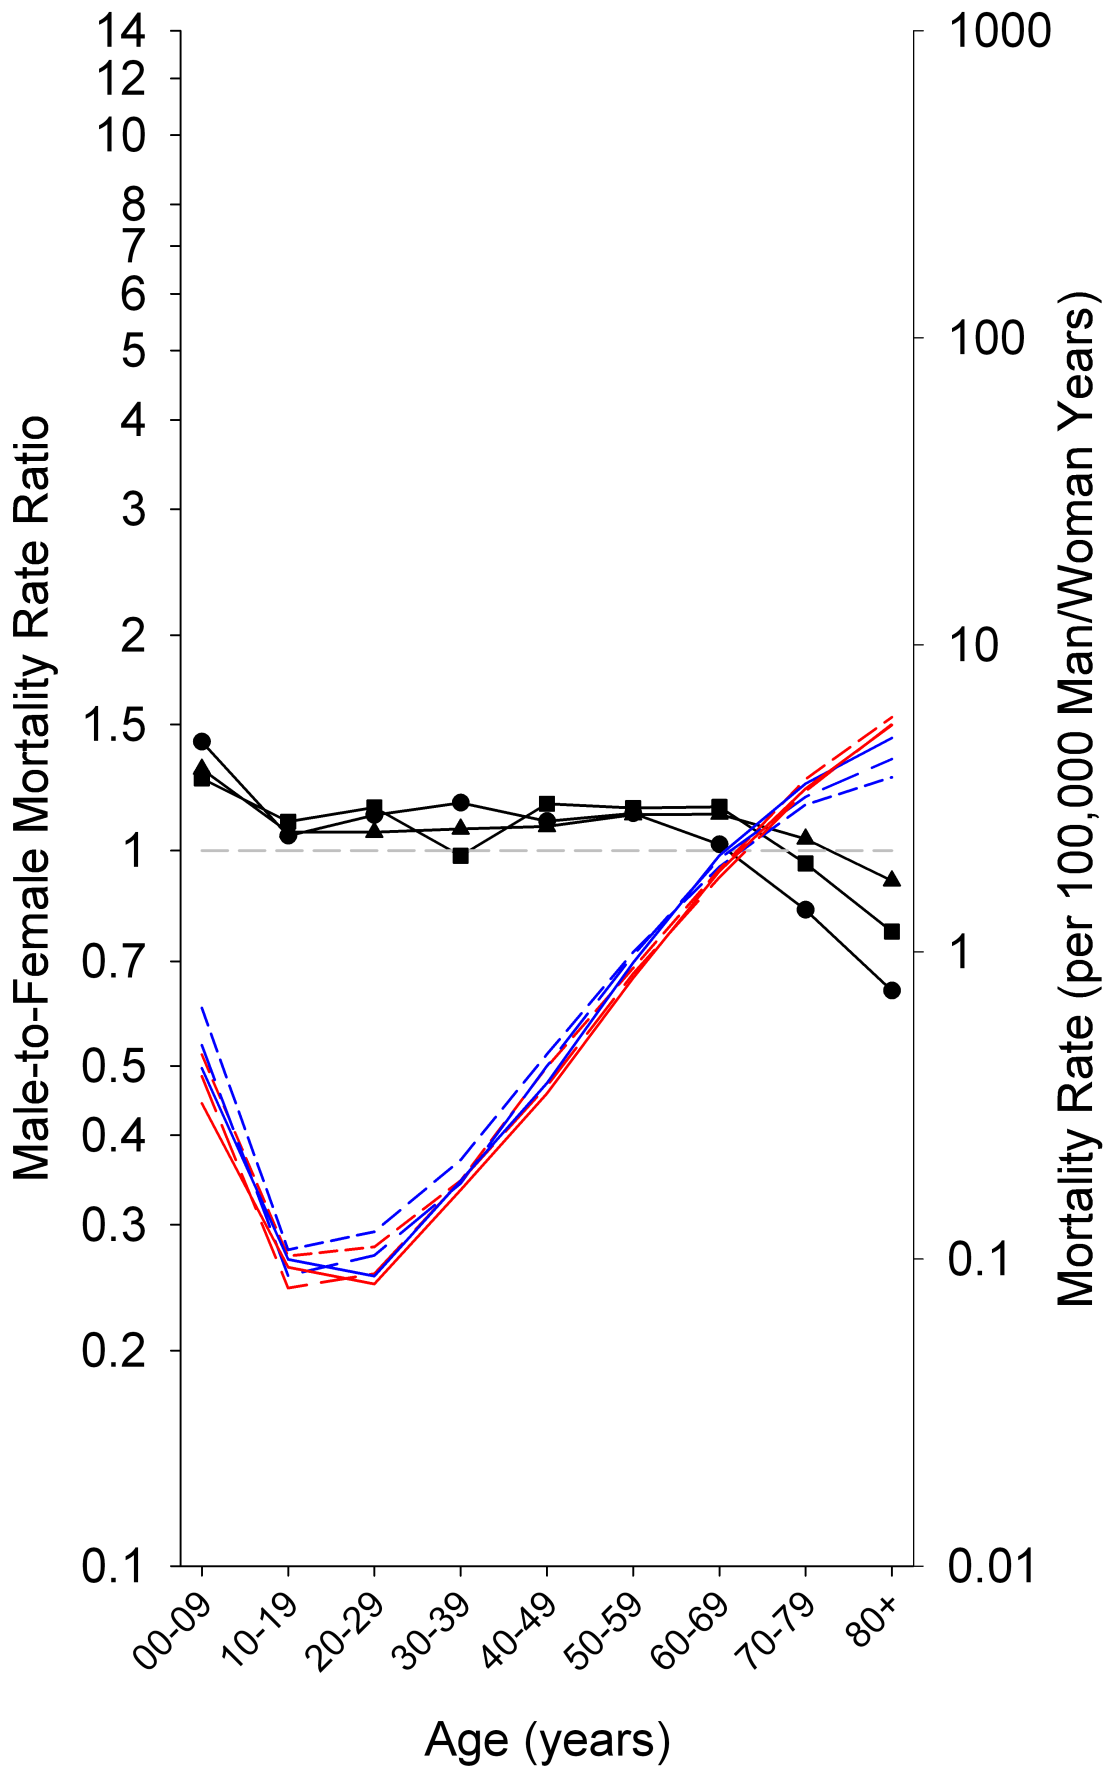

Supplement: NIHMS302507-supplement-9.pdf [file NIHMS302507-supplement-9.pdf]
